# Supplementary material
Source: PubMed Central journal article supplement (PMC4987242)
Supplement: NIHMS792001-supplement-Supplementary_Information.pdf [file NIHMS792001-supplement-Supplementary_Information.pdf]

**Electronic Supplementary Information for:**

**Linker design for the modular assembly of multifunctional and targeted platinum(II)-containing anticancer agents**

Song Ding and Ulrich Bierbach

Department of Chemistry, Wake Forest University, Winston-Salem, North Carolina 27109,  
United States

| <b>Content</b>                                                 | <b>Page</b> |
|----------------------------------------------------------------|-------------|
| S1. NMR SPECTROSCOPY                                           |             |
| Figs. S1-S8                                                    | S3-S10      |
| S2. LC-MS ANALYSIS OF PURIFIED COMPOUNDS                       |             |
| Figs. S9-S12                                                   | S11-S14     |
| S3. LC-MS ANALYSIS OF COUPLING REACTIONS                       |             |
| Figs. S13-S27                                                  | S15-S29     |
| S4. LC-MS STUDY OF ESTER REACTIVITY                            |             |
| Figs. S28-S39                                                  | S30-S41     |
| S5. SUPPLEMENTARY TABLES                                       |             |
| Table S1. Conversion Yields and HR-ESMS Results for Conjugates | S42         |
| Table S2. Summary of Coupling Reagents Used                    | S43         |

## S1. NMR SPECTROSCOPY

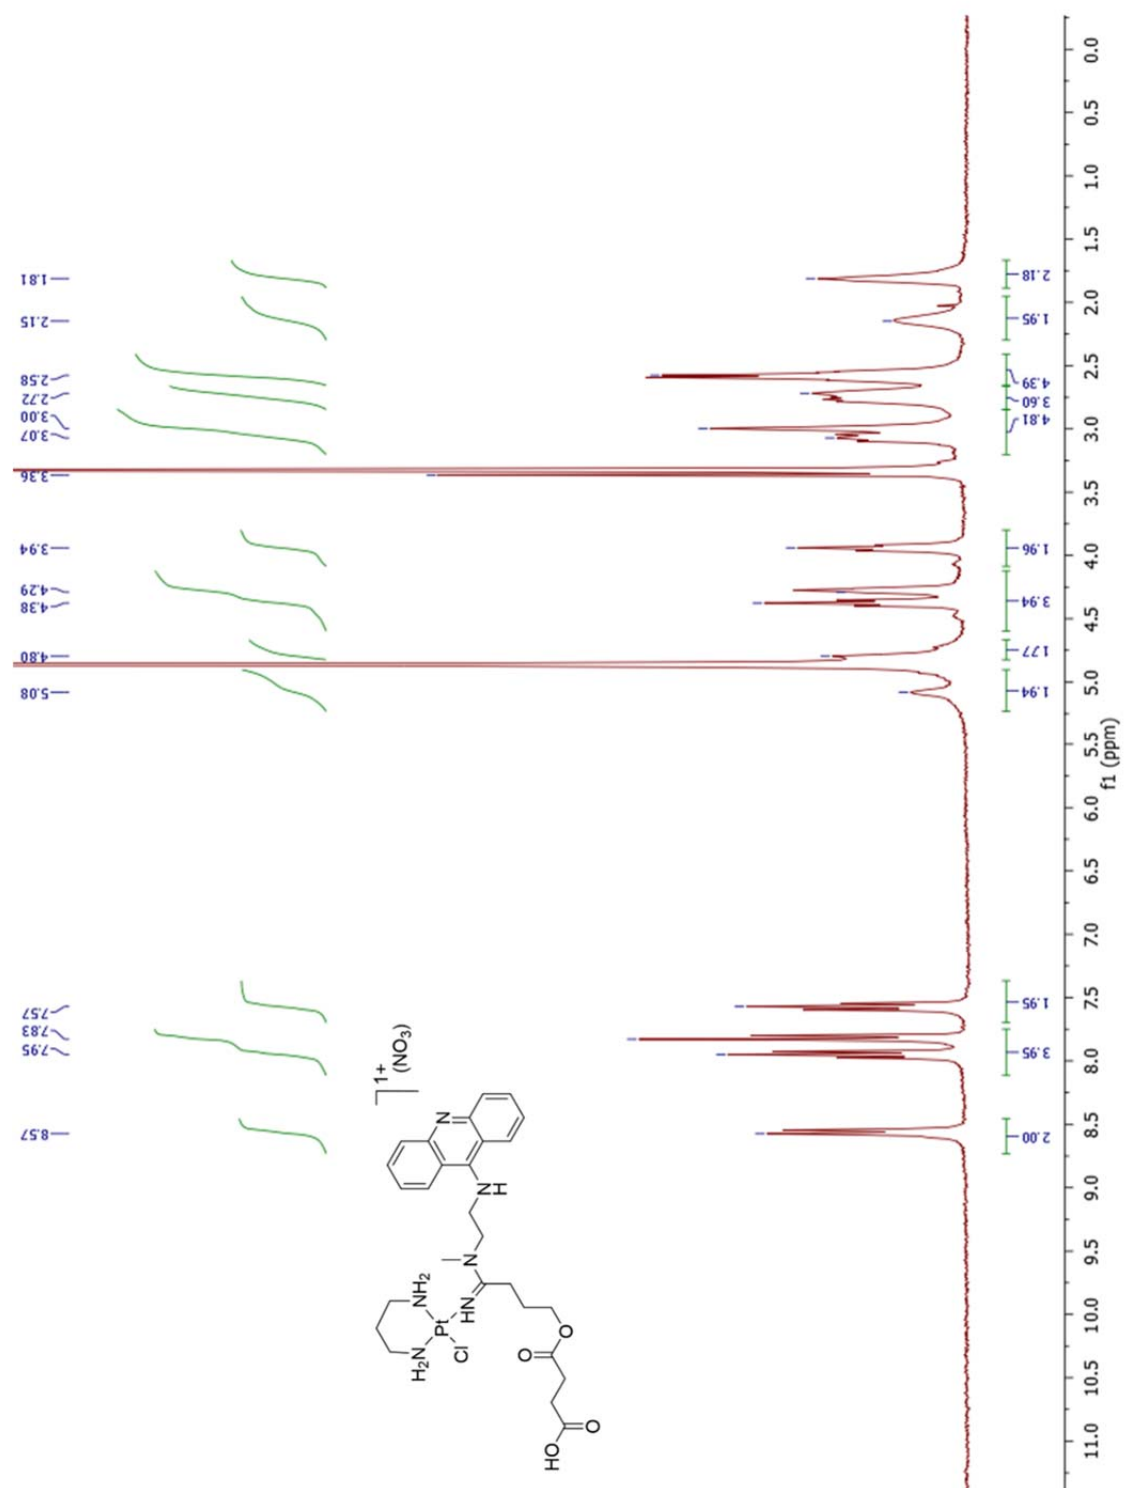

**Figure S1.**  $^1\text{H}$  NMR spectrum of **P1** in  $\text{MeOH-}d_4$ .

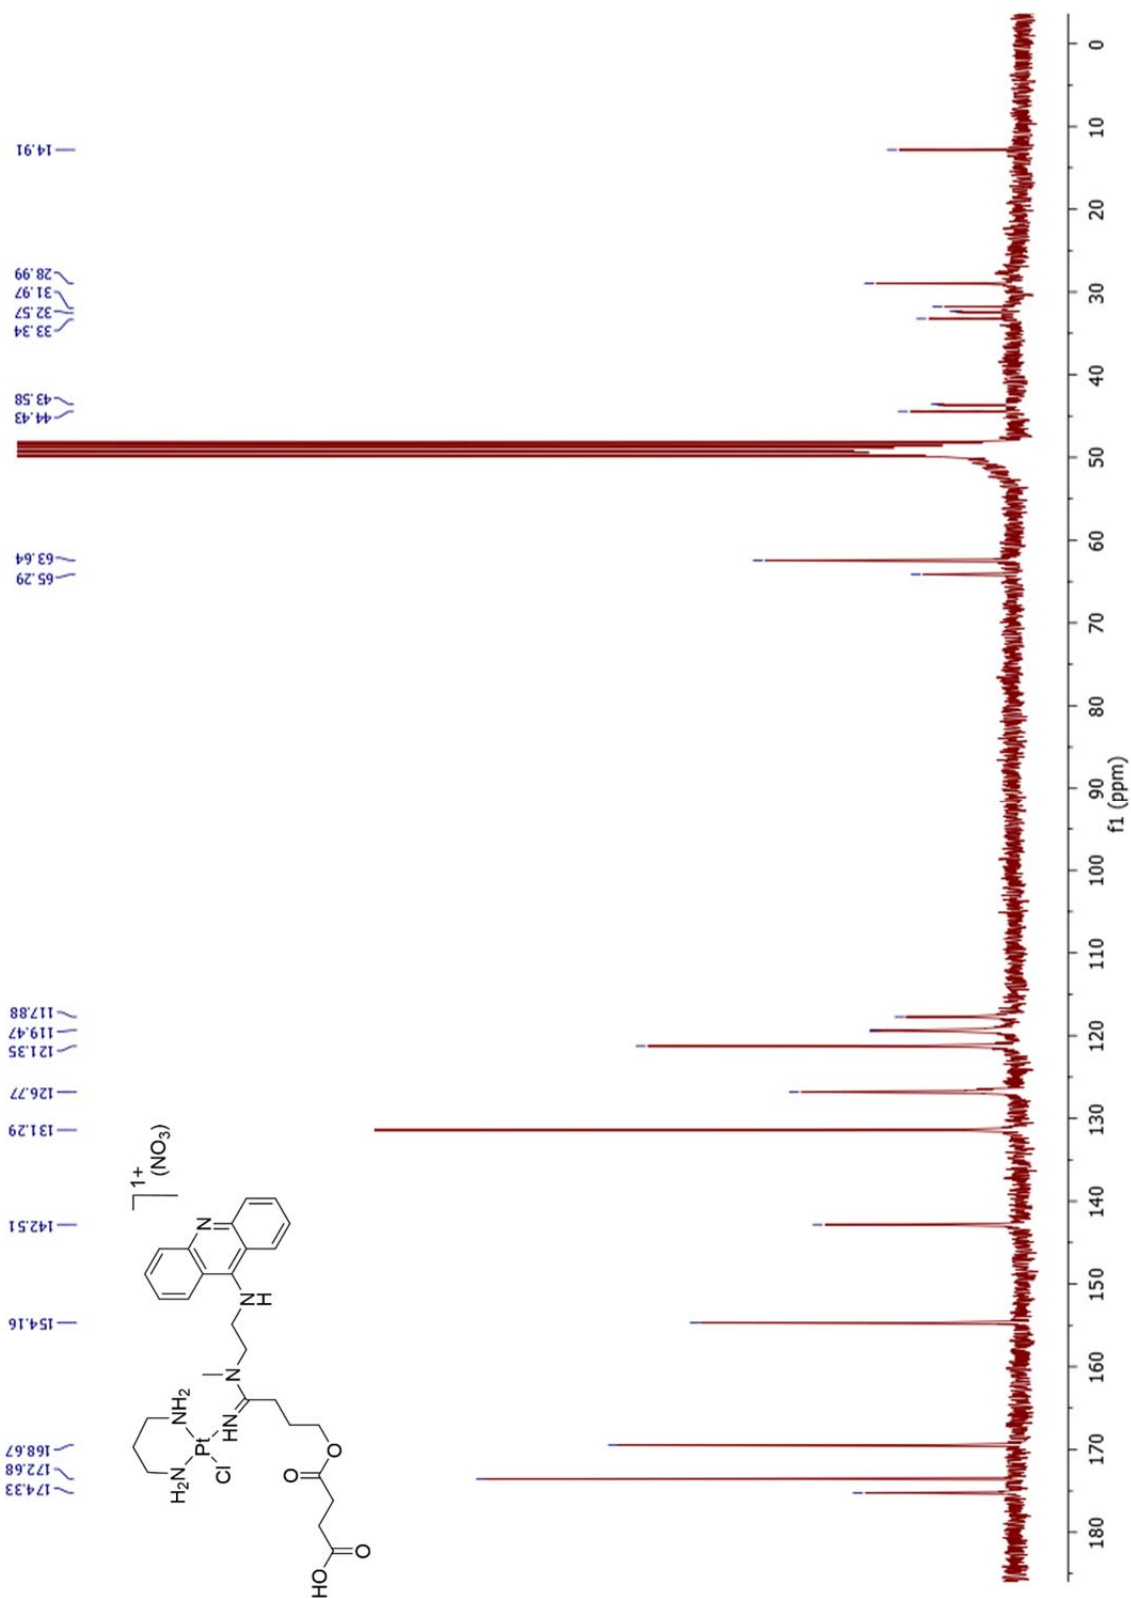

**Figure S2.**  $^{13}\text{C}$  NMR spectrum of **P1** in  $\text{MeOH-}d_4$ .

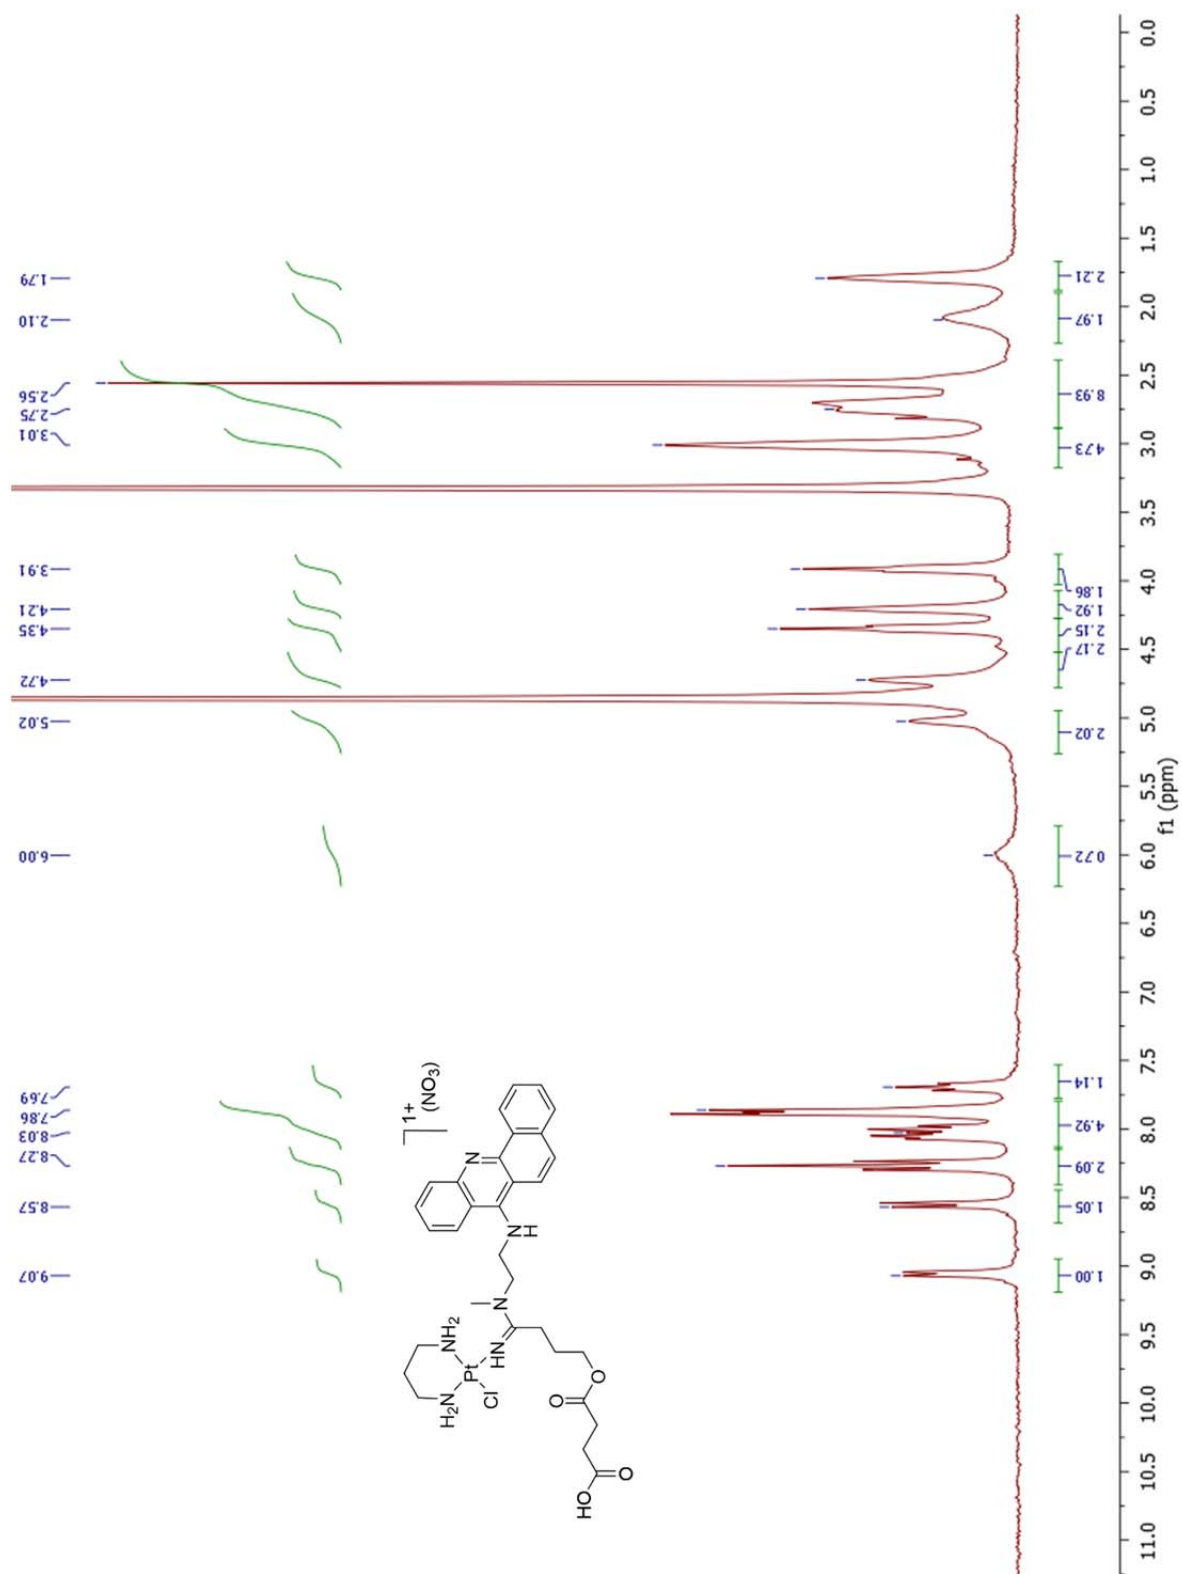

**Figure S3.**  $^1\text{H}$  NMR spectrum of **P2** in  $\text{MeOH-}d_4$ .

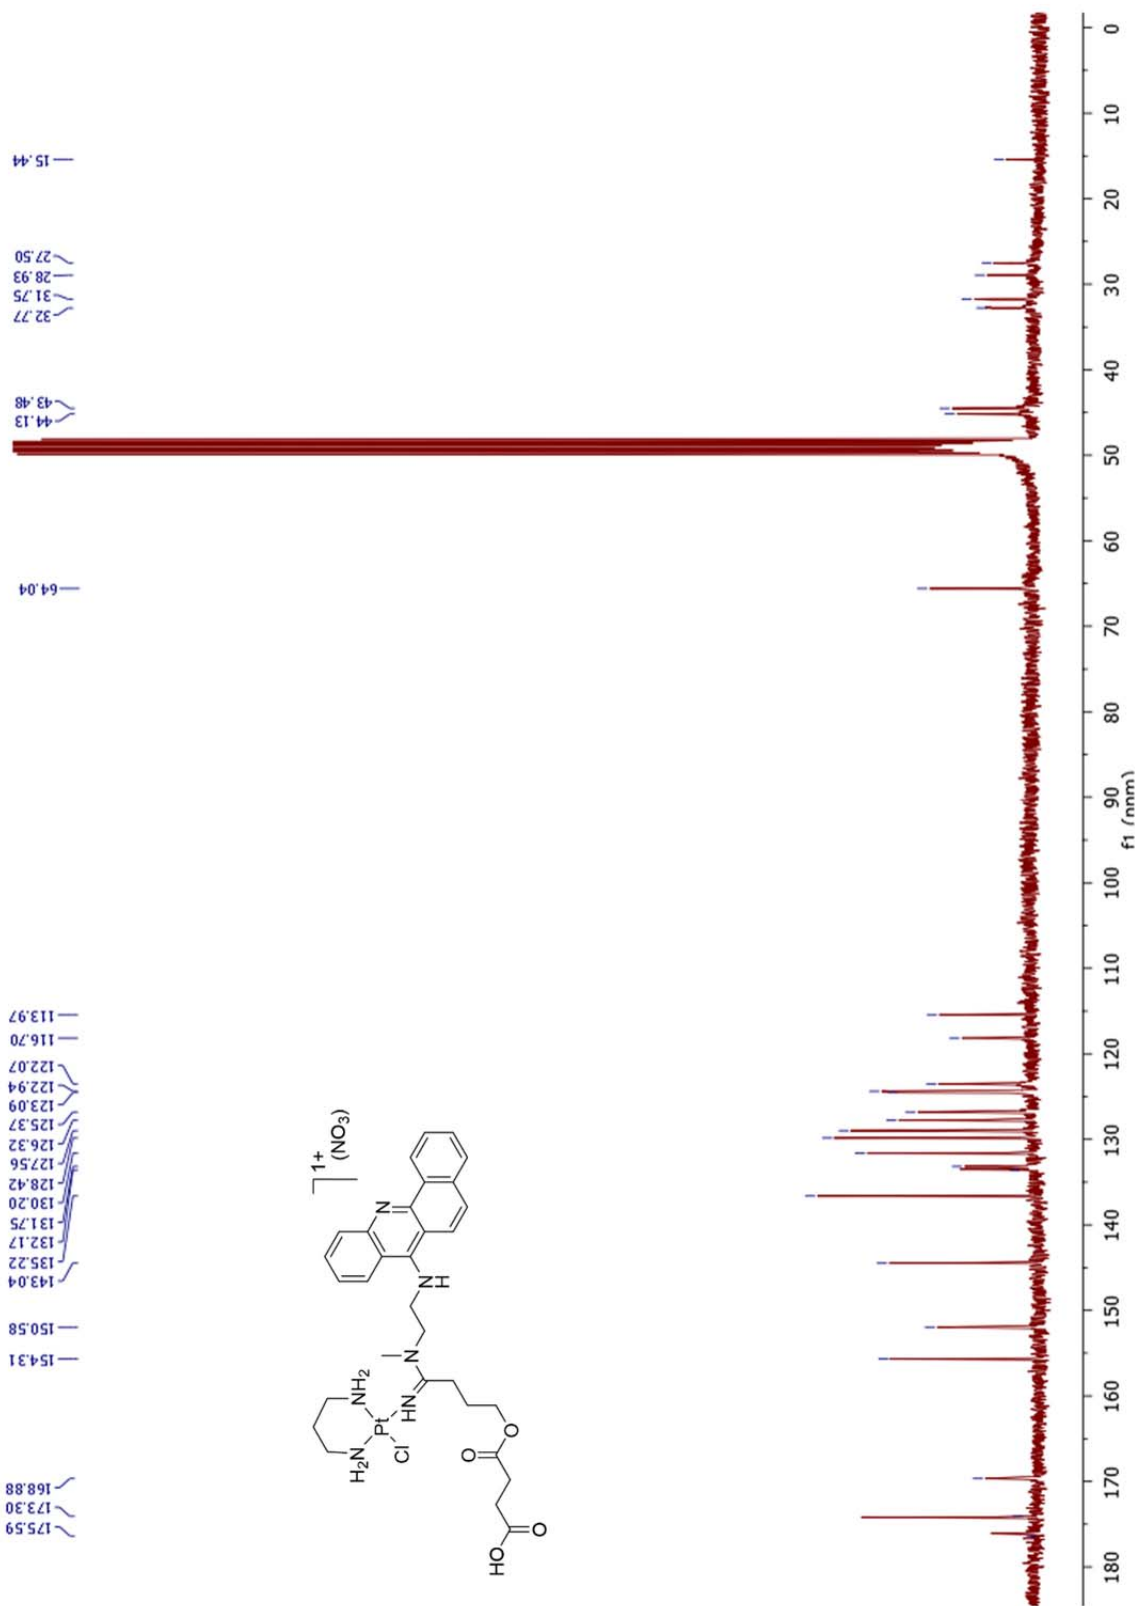

**Figure S4.**  $^{13}\text{C}$  NMR spectrum of P2 in  $\text{MeOH-}d_4$ .

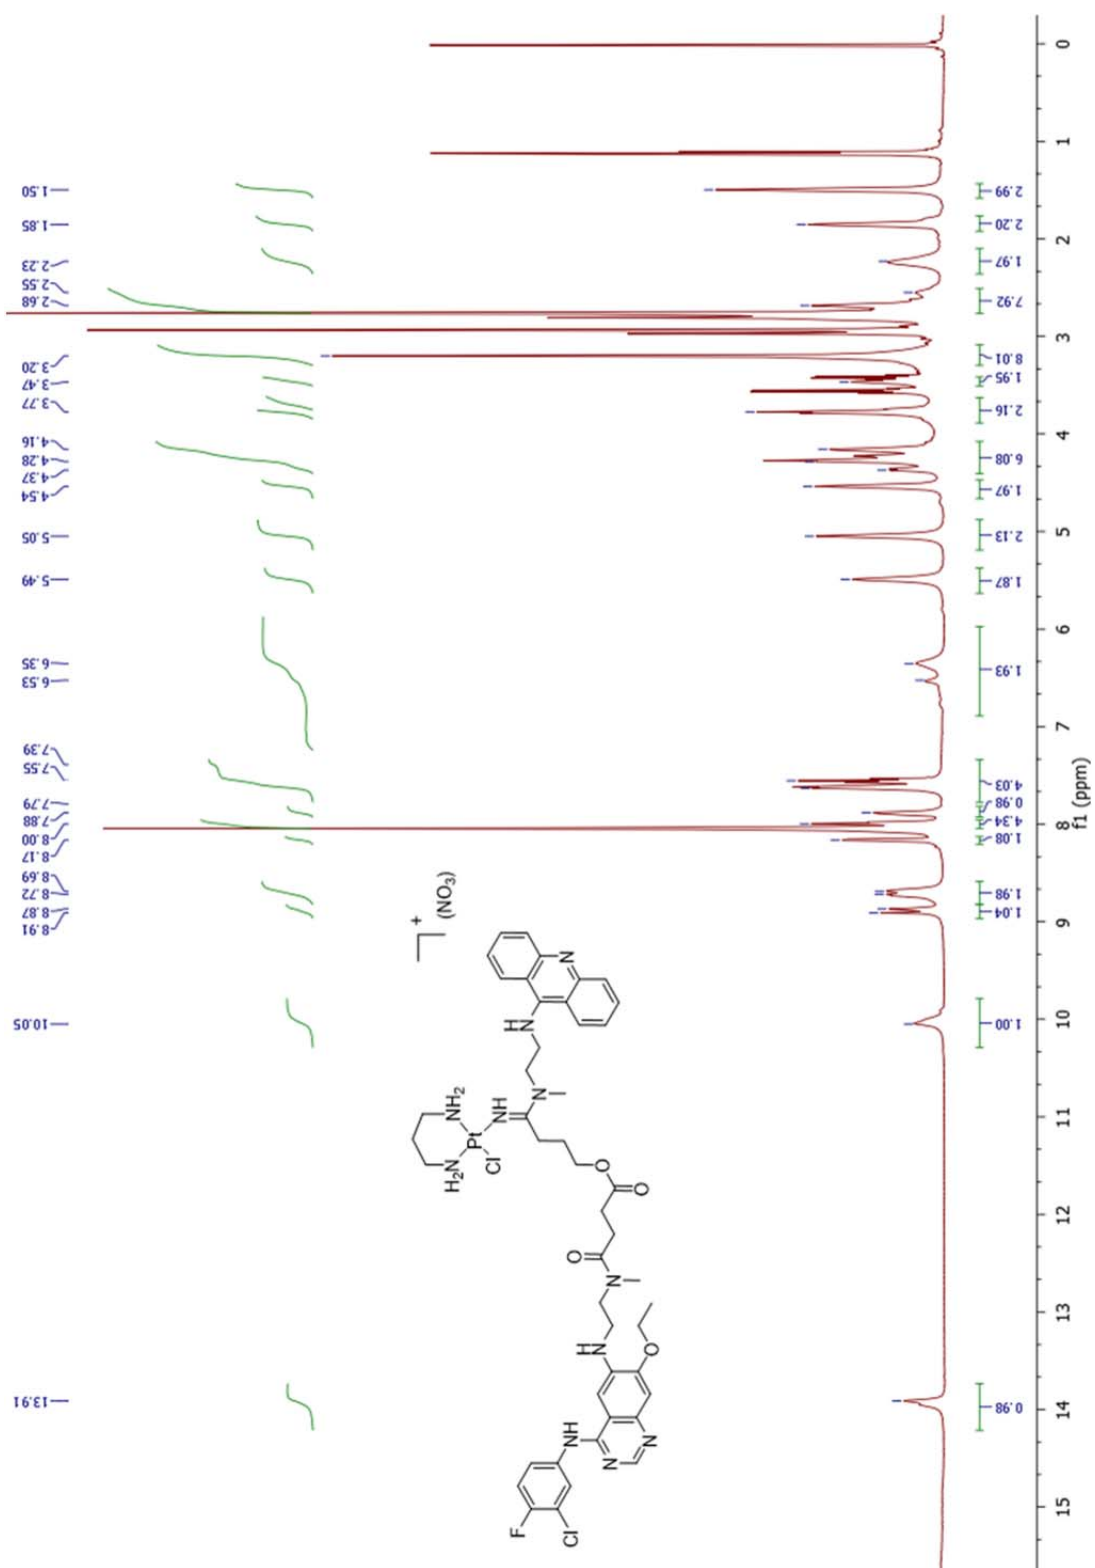

**Figure S5.**  $^1\text{H}$  NMR spectrum of **P1-N7** in  $\text{DMF-}d_7$ .

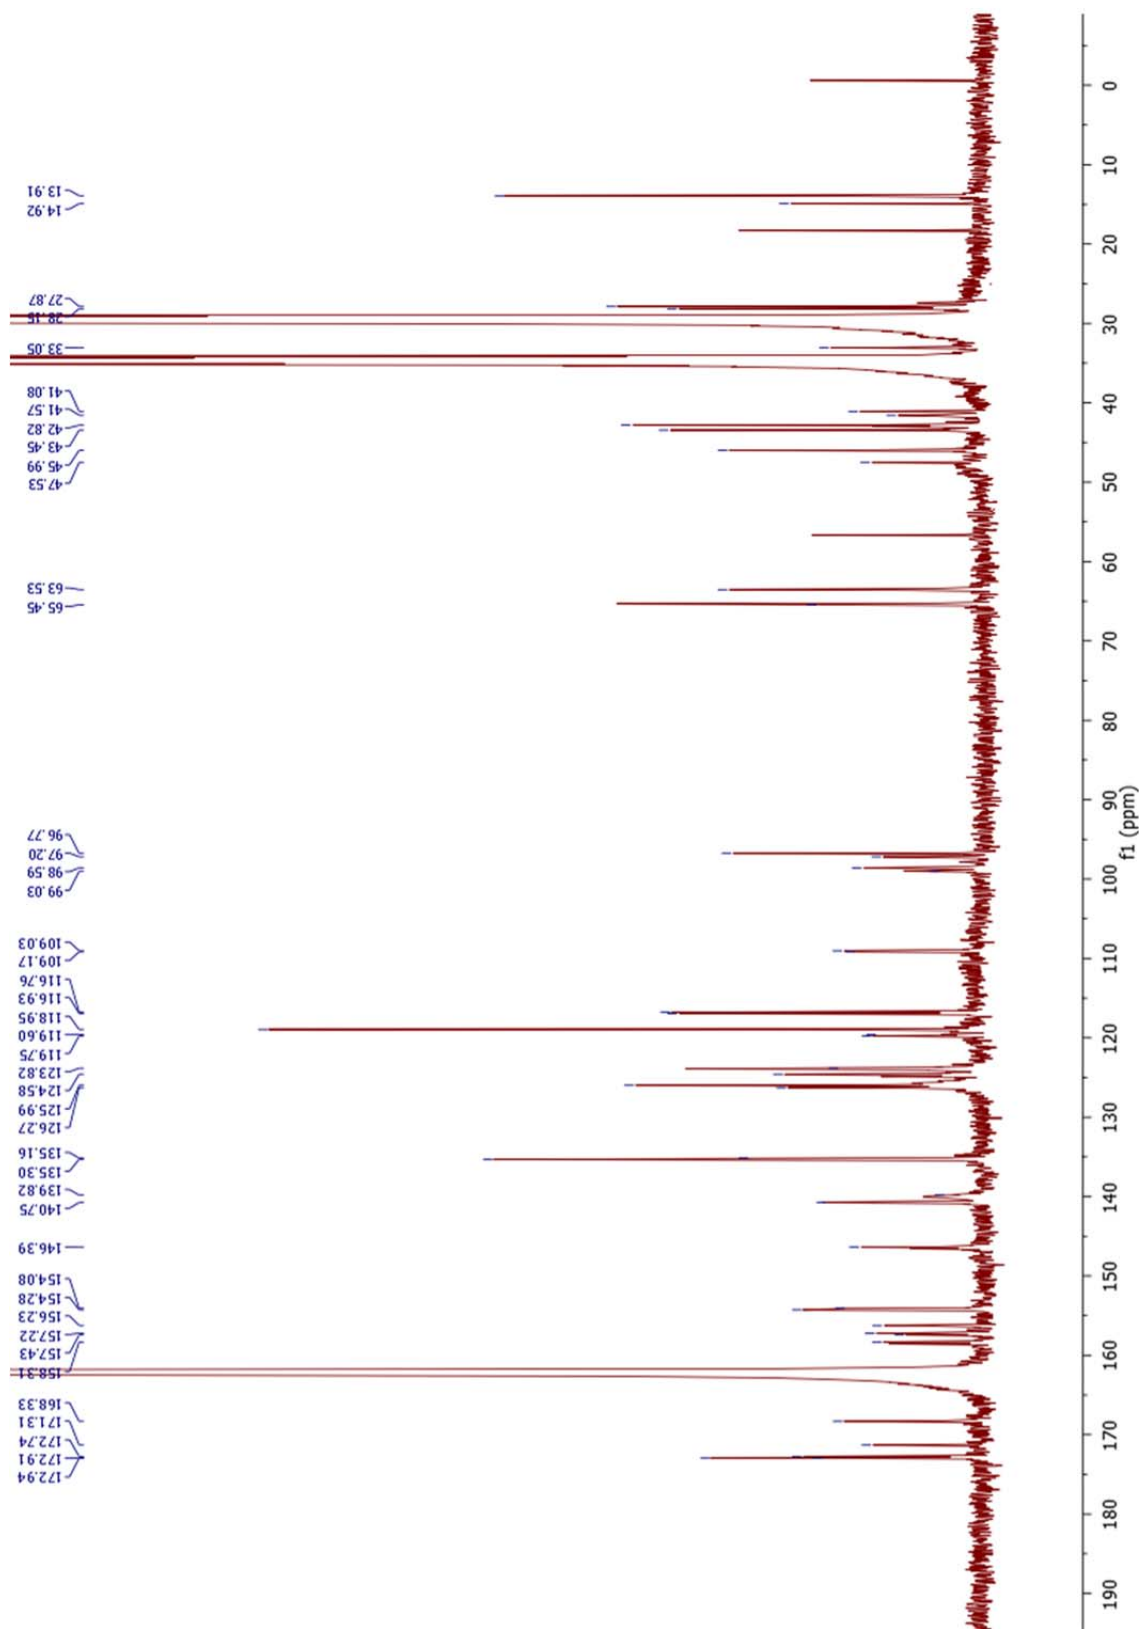

**Figure S6.**  $^{13}\text{C}$  NMR spectrum of P1-N7 in  $\text{DMF-}d_7$ .



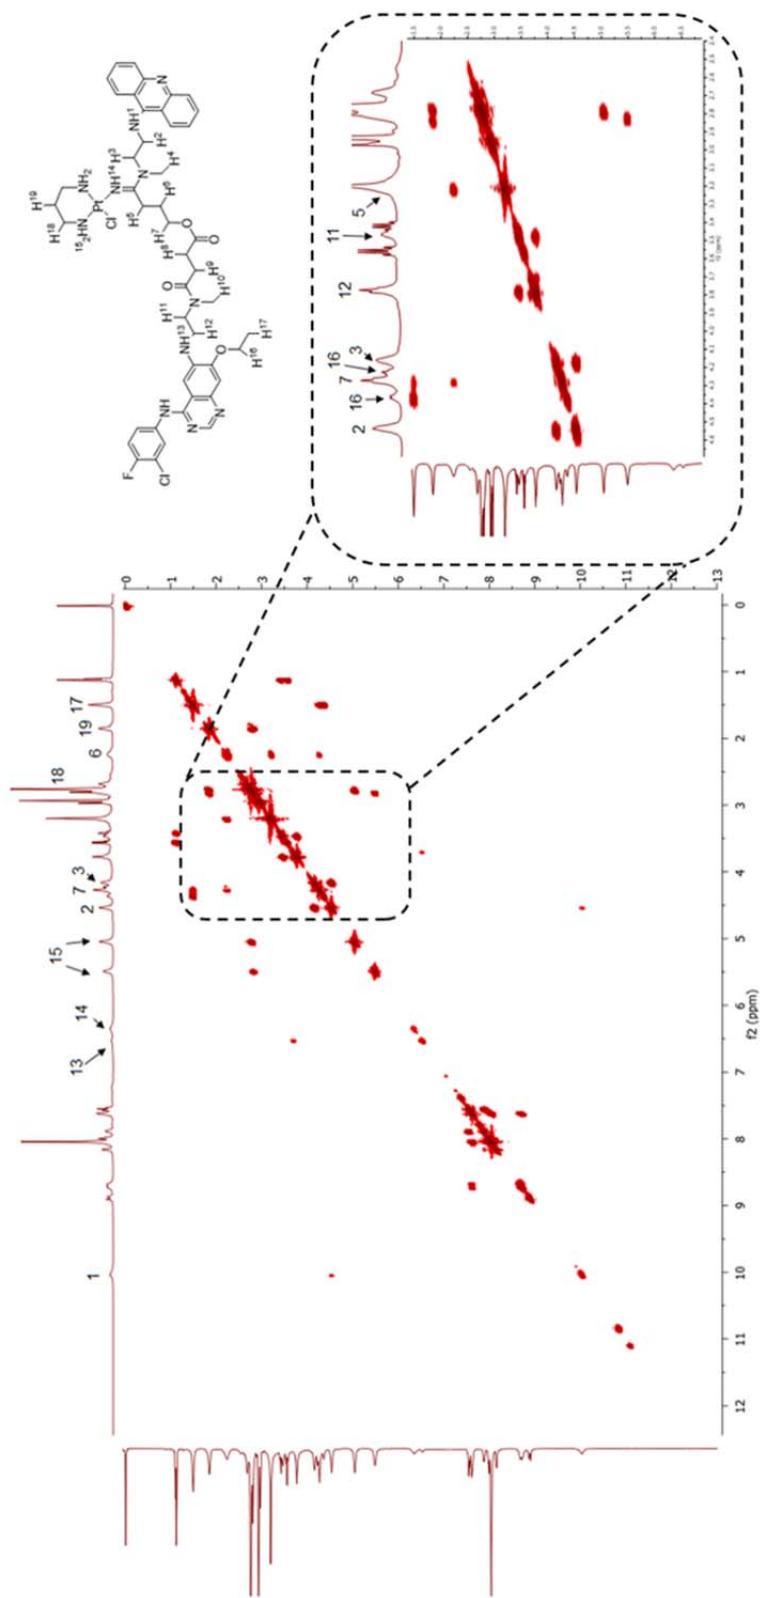

**Figure S7.**  $^1\text{H}$ - $^1\text{H}$  COSY spectrum of compound **P1-N7** in  $\text{DMF-}d_7$ .

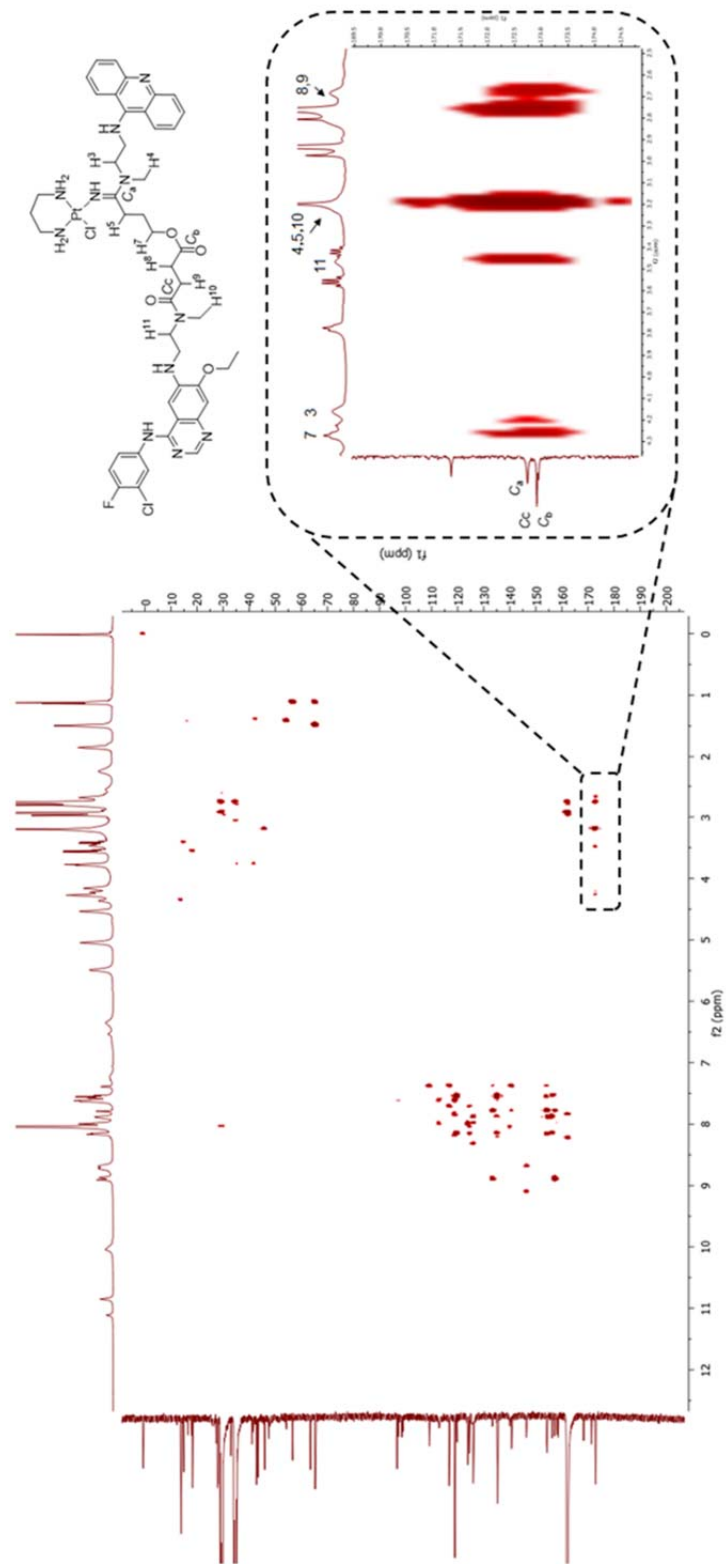

**Figure S8.**  $^1\text{H}$ - $^{13}\text{C}$  HMBC spectrum of compound P1-N7 in  $\text{DMF-}d_7$ .

## S2. LC-MS ANALYSIS OF PURIFIED COMPOUNDS

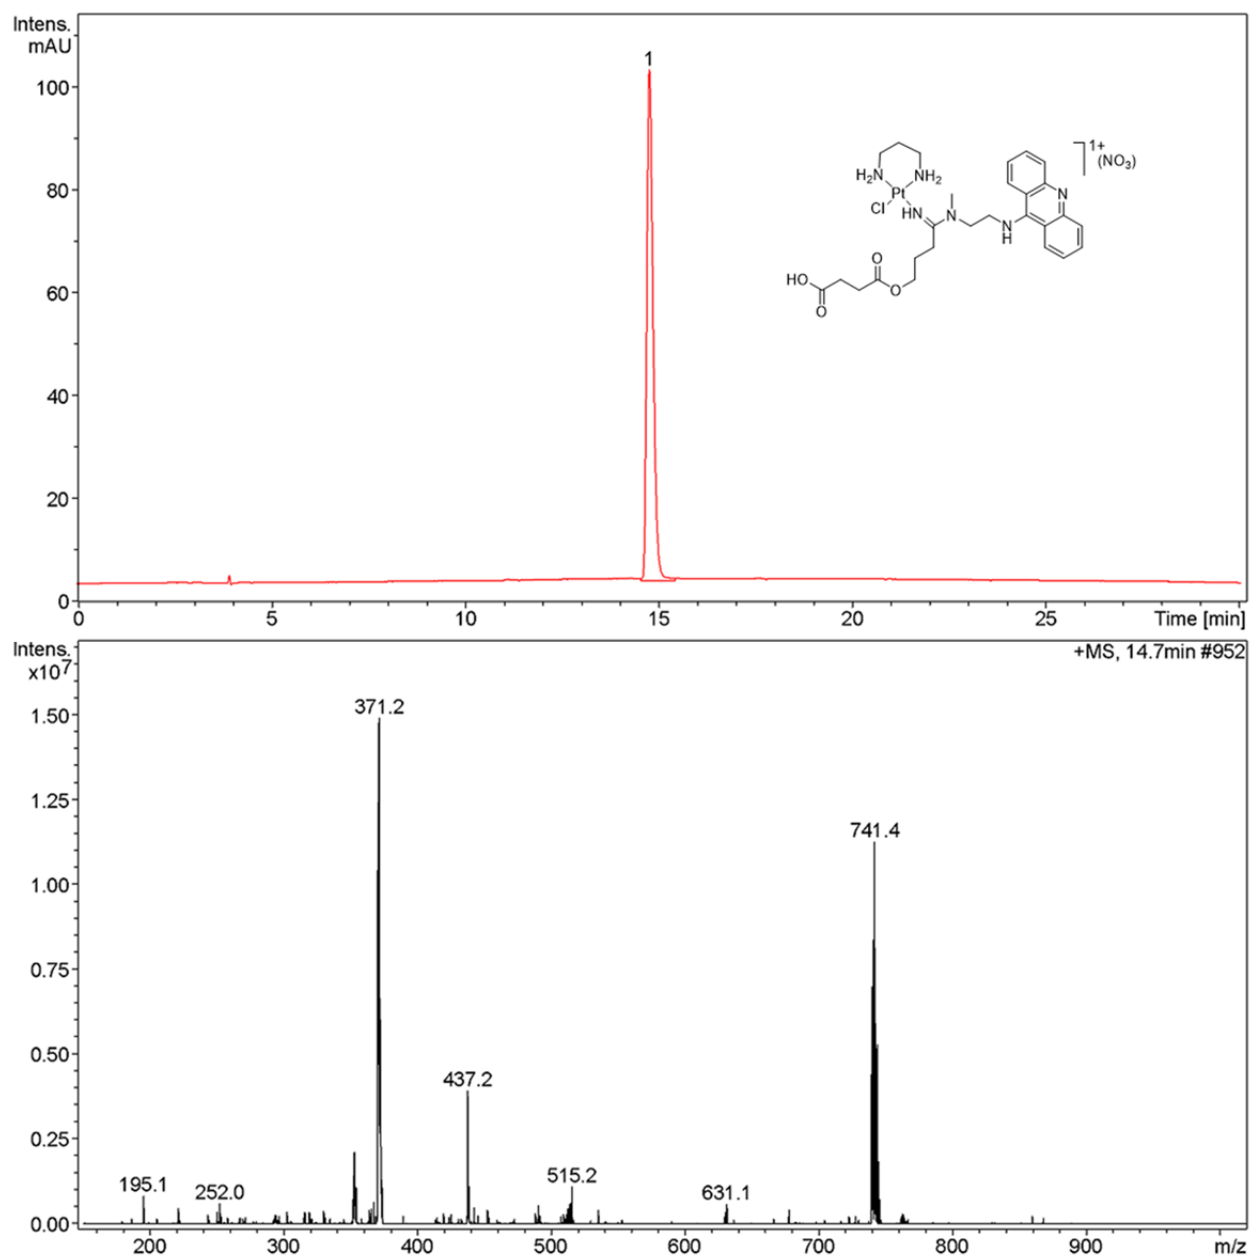

**Figure S9.** LC-MS analysis of purified **P1**.

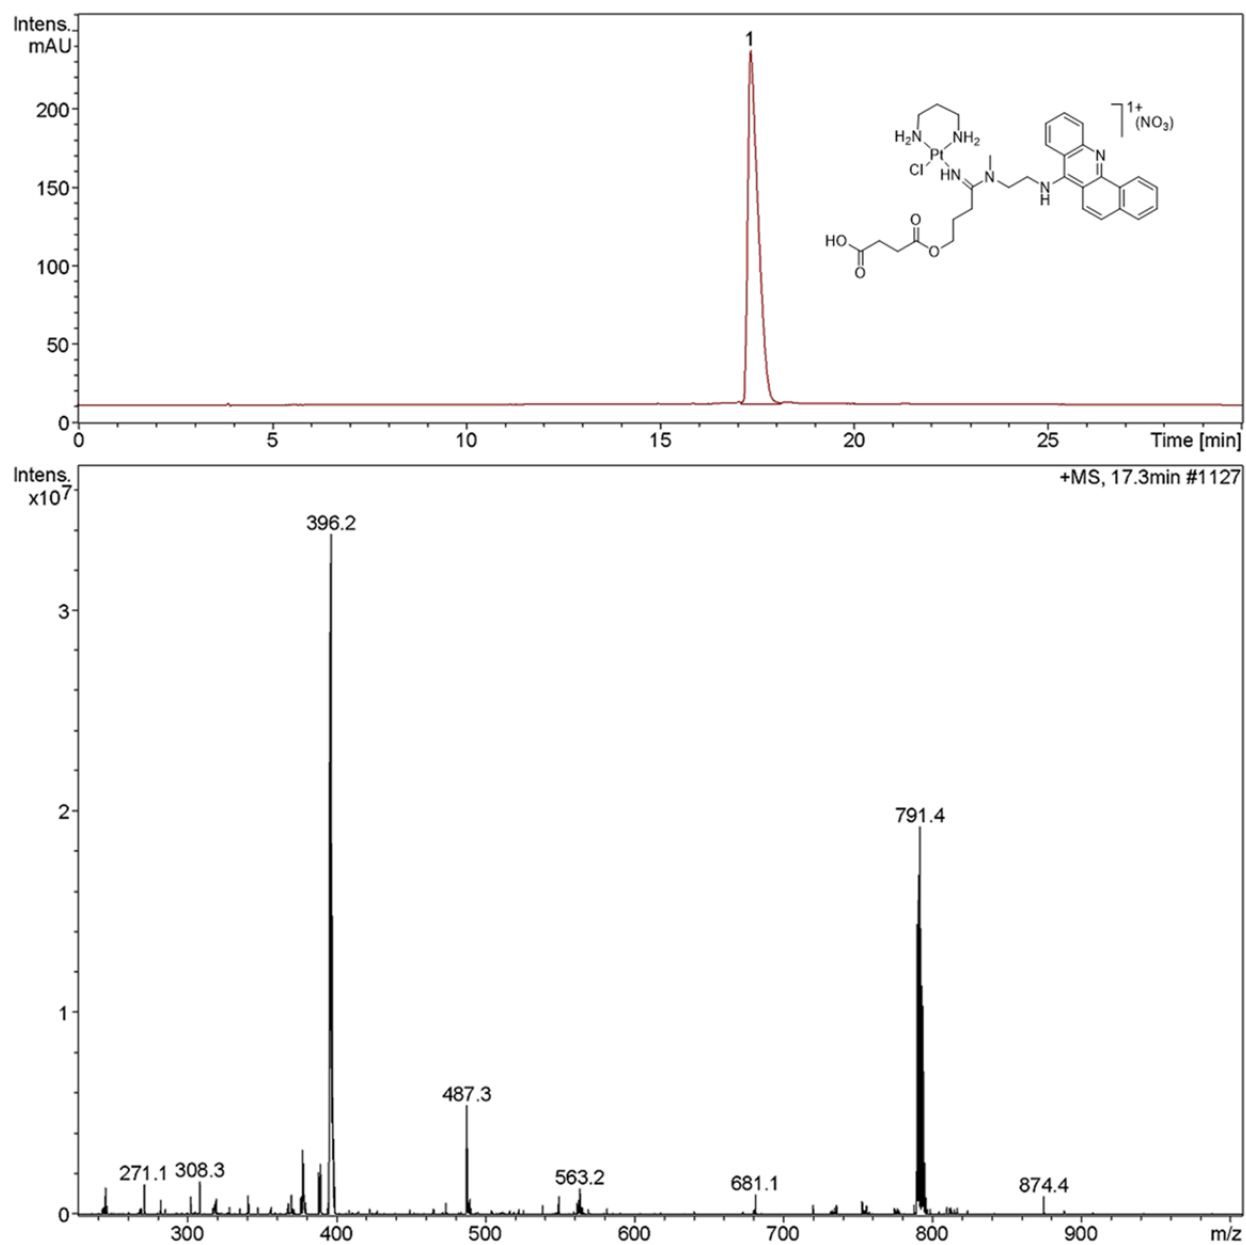

**Figure S10.** LC-MS analysis of purified **P2**.

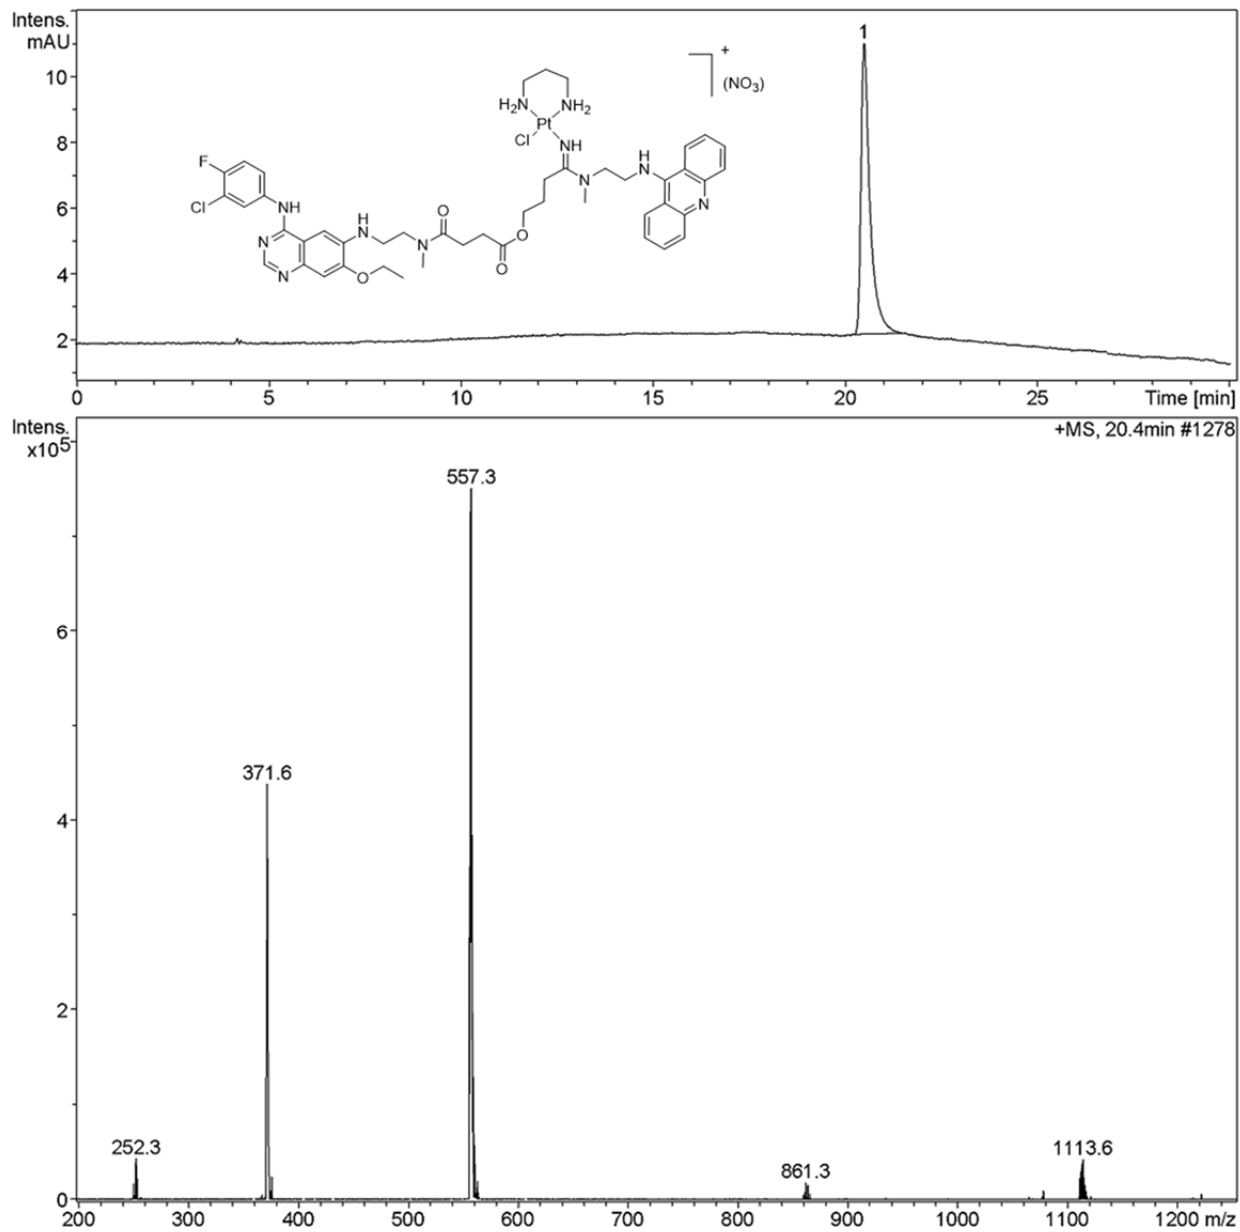

**Figure S11.** LC-MS analysis of purified P1-N7.

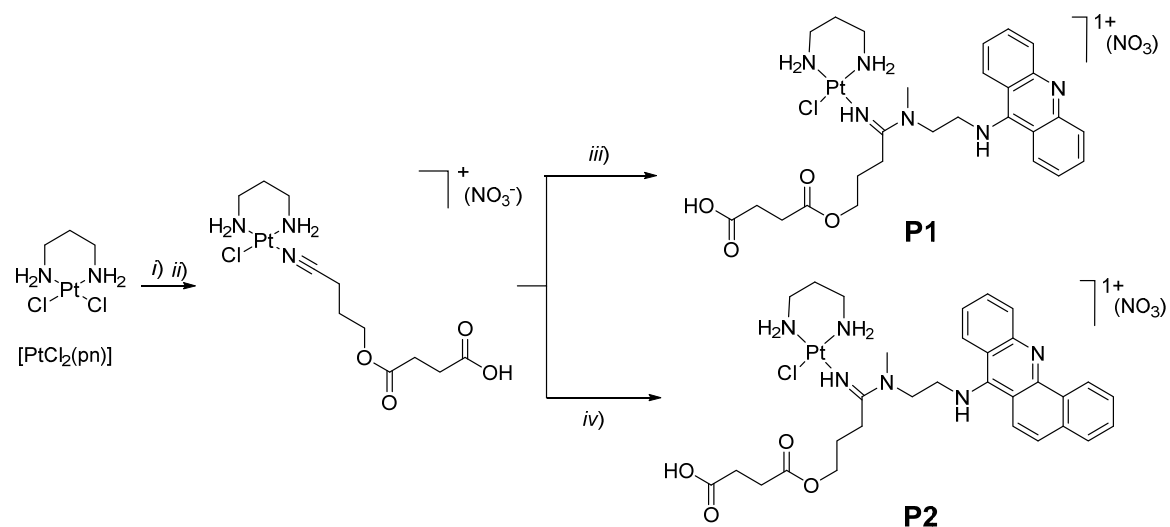

**Figure S12.** Synthesis of **P1** and **P2**. i)  $\text{AgNO}_3$ , DMF, rt, ii)  $\text{HOOC}(\text{CH}_2)_2\text{C}(\text{O})\text{O}(\text{CH}_2)_3\text{CN}$  (**3**), DMF,  $60^\circ\text{C}$ , 4 h, iii)  $\text{N}^1$ -(acridin-9-yl)- $\text{N}^2$ -methylethane-1,2-diamine (**A1**), DMF,  $4^\circ\text{C}$ , iv)  $\text{N}^1$ -(benzo[*c*]acridin-7-yl)- $\text{N}^2$ -methylethane-1,2-diamine (**B1**), DMF,  $4^\circ\text{C}$ .

### S3. LC-MS ANALYSIS OF COUPLING REACTIONS

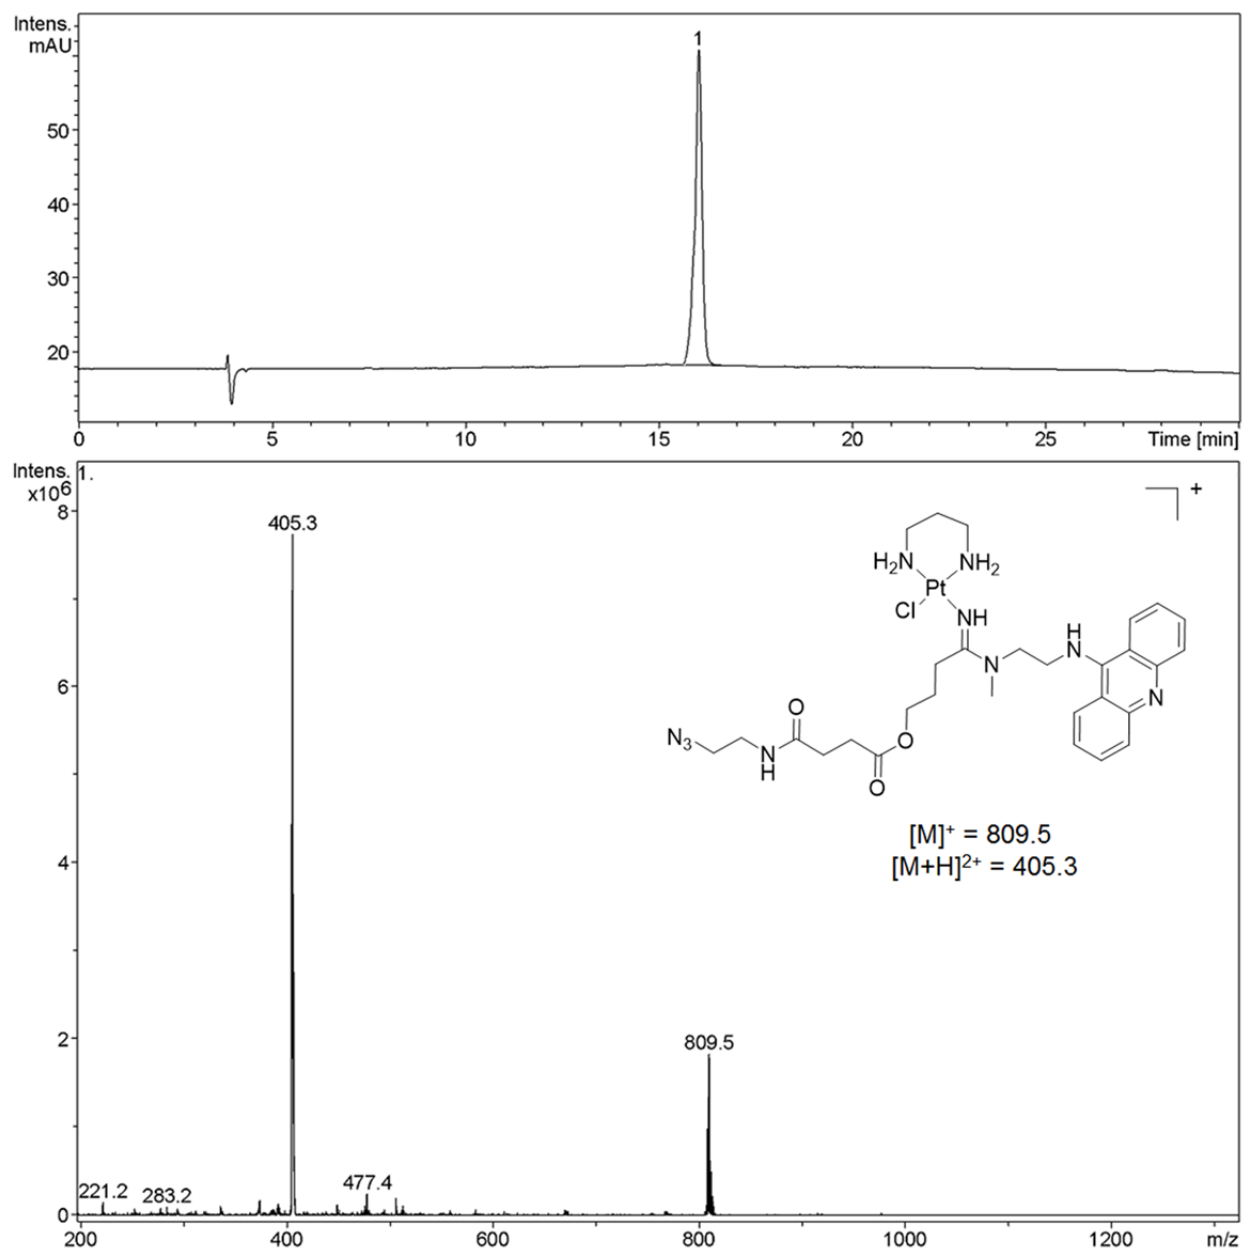

**Figure S13.** LC-MS analysis of the reaction mixture for the preparation of **P1-N1**.

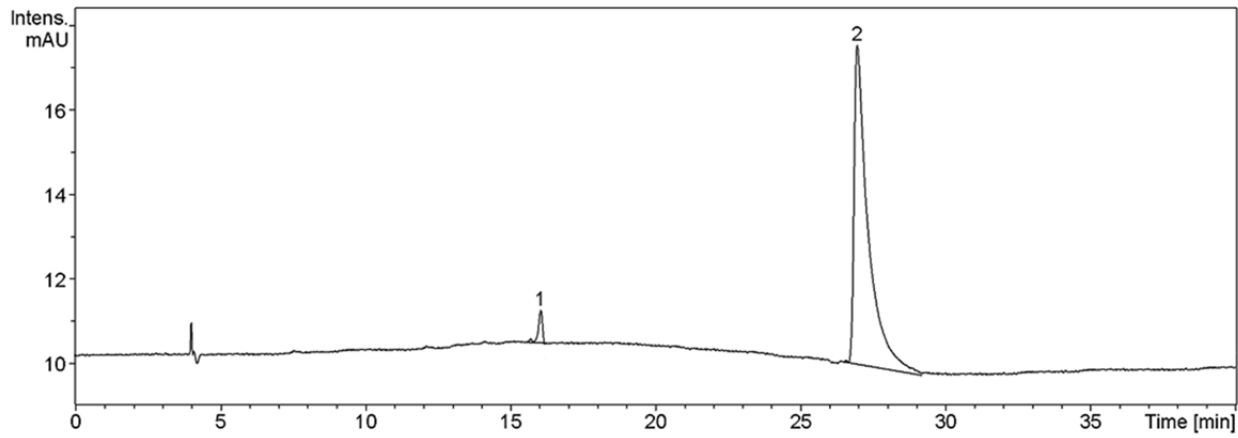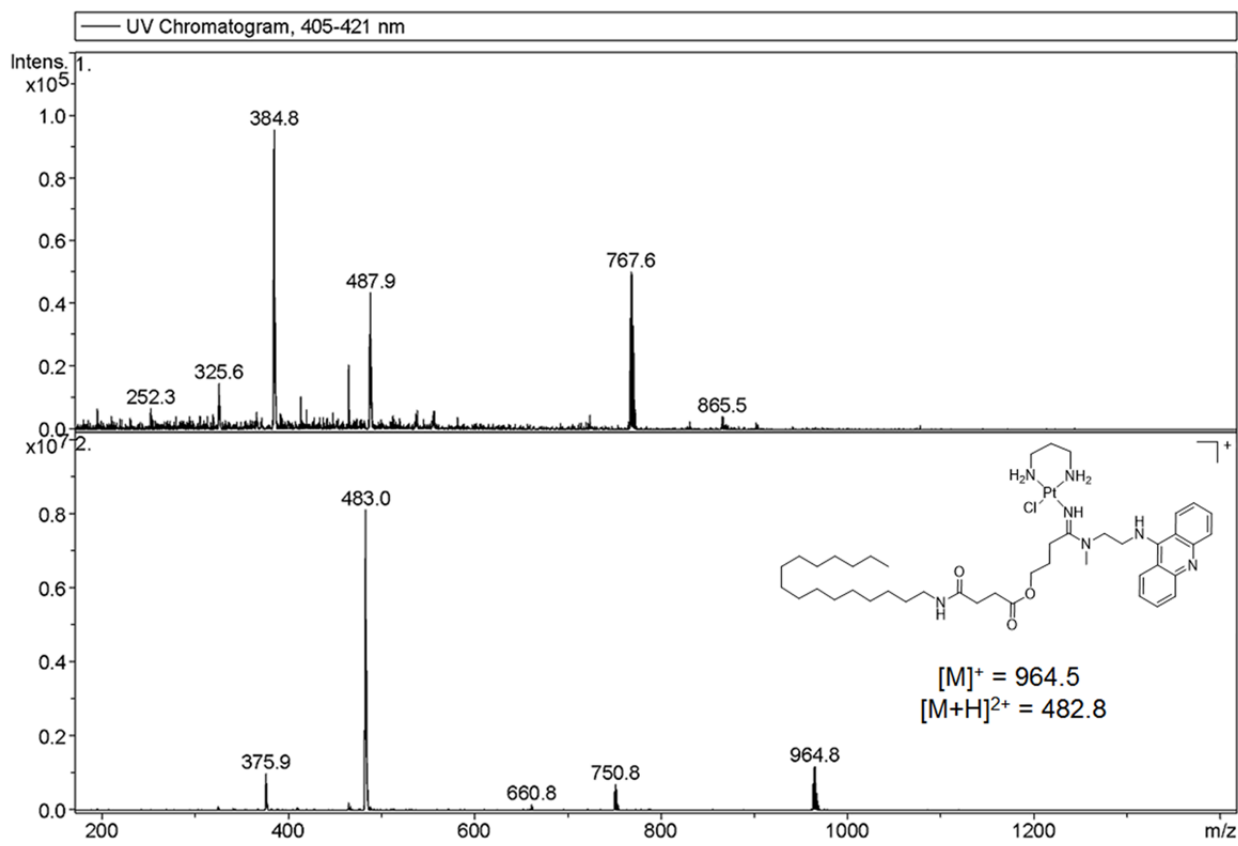

**Figure S14.** LC-MS analysis of the reaction mixture for the preparation of **P1-N2**.



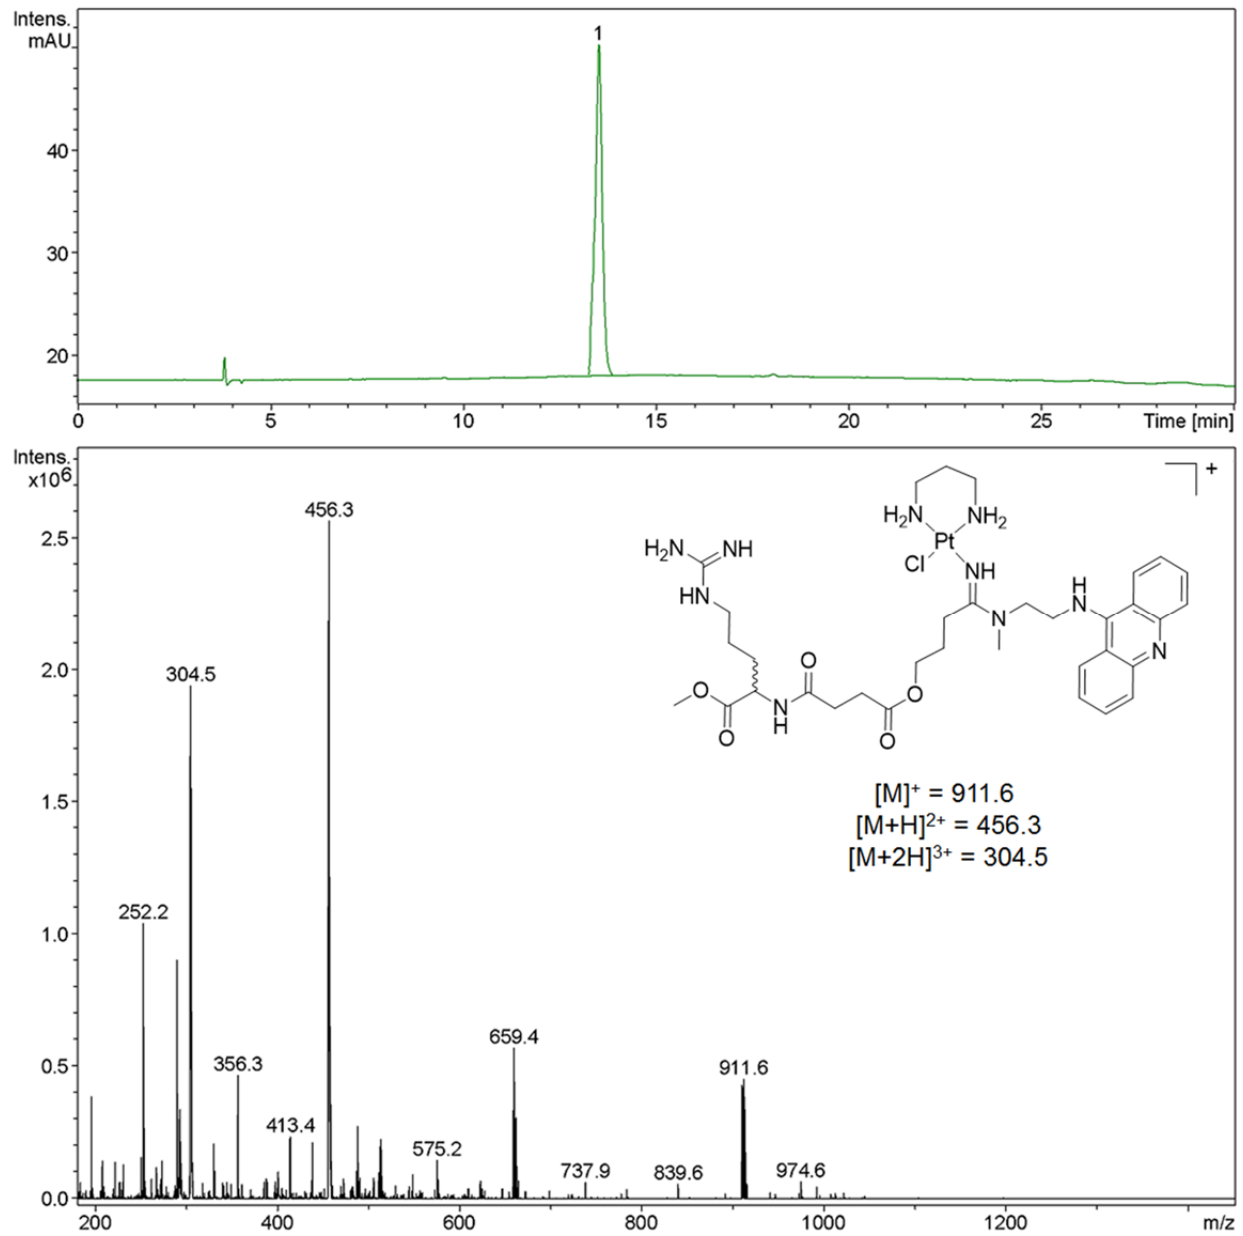

**Figure S15.** LC-MS analysis of the reaction mixture for the preparation of P1-N4.

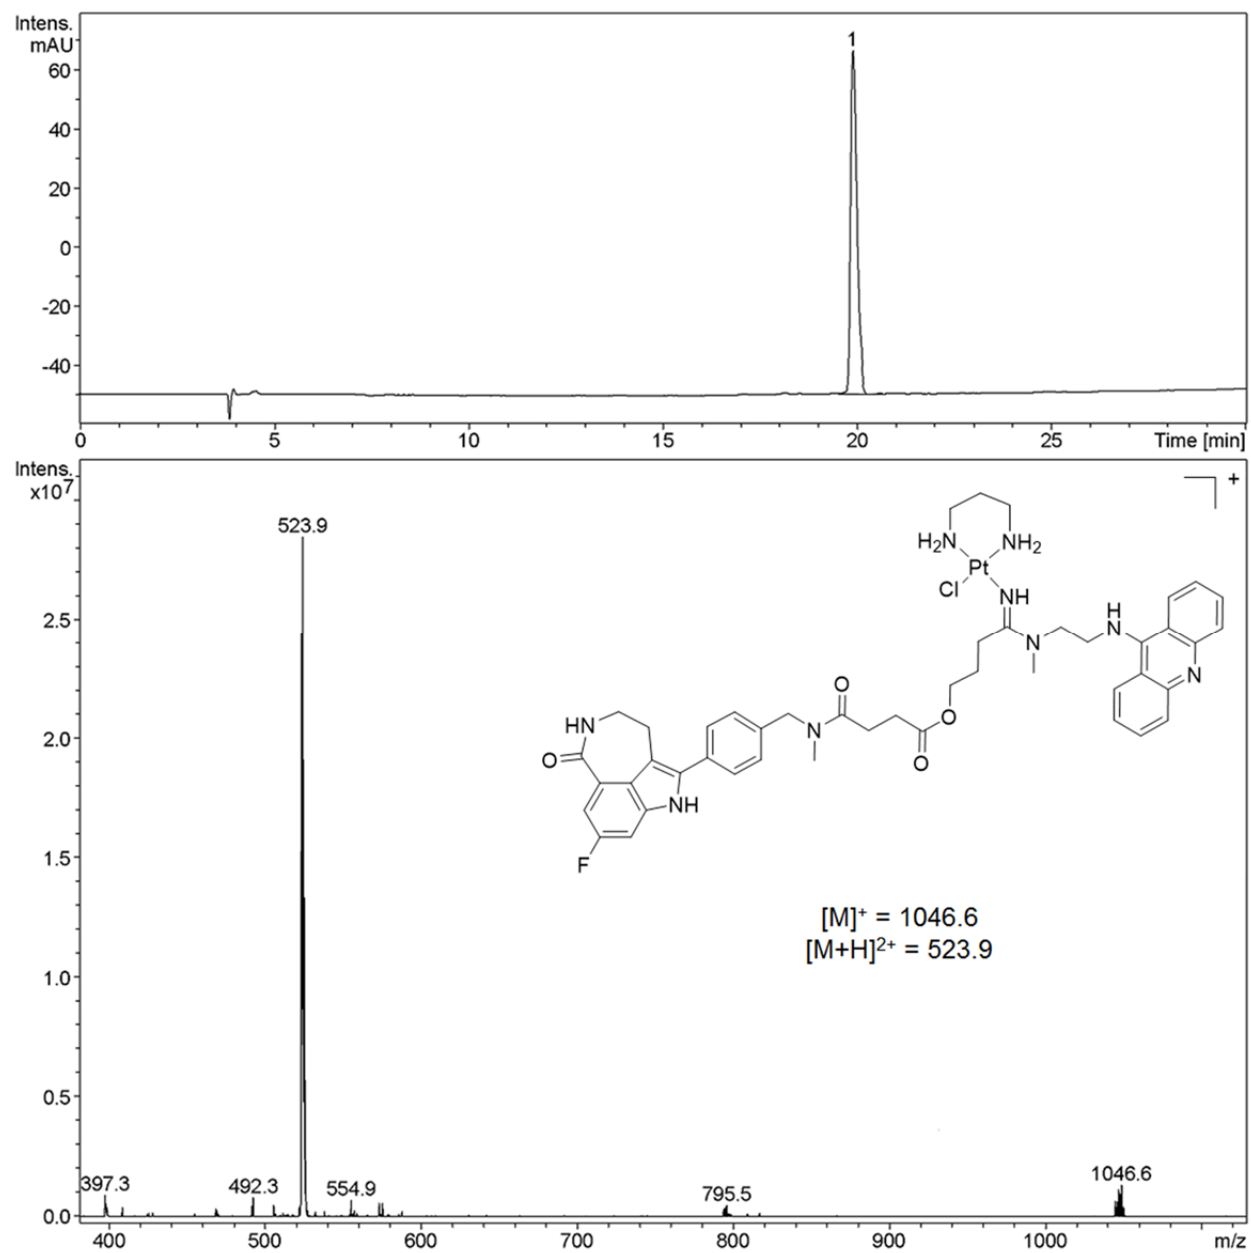

**Figure S16.** LC-MS analysis of the reaction mixture for the preparation of **P1-N5**.

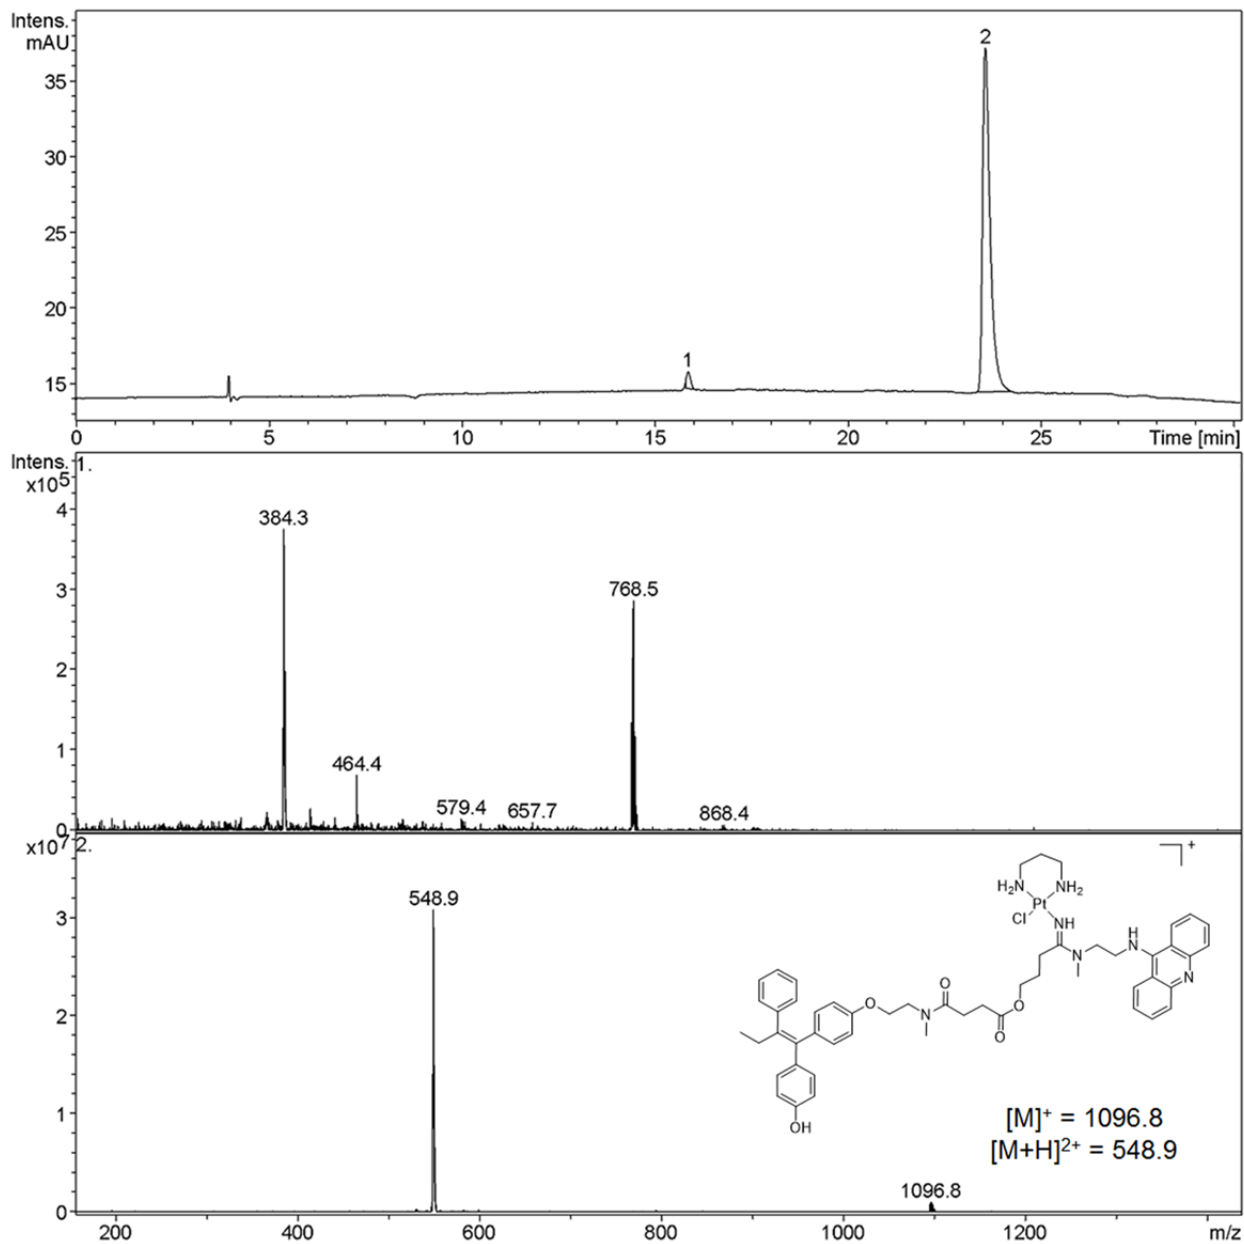

**Figure S17.** LC-MS analysis of the reaction mixture for the preparation of P1-N6.

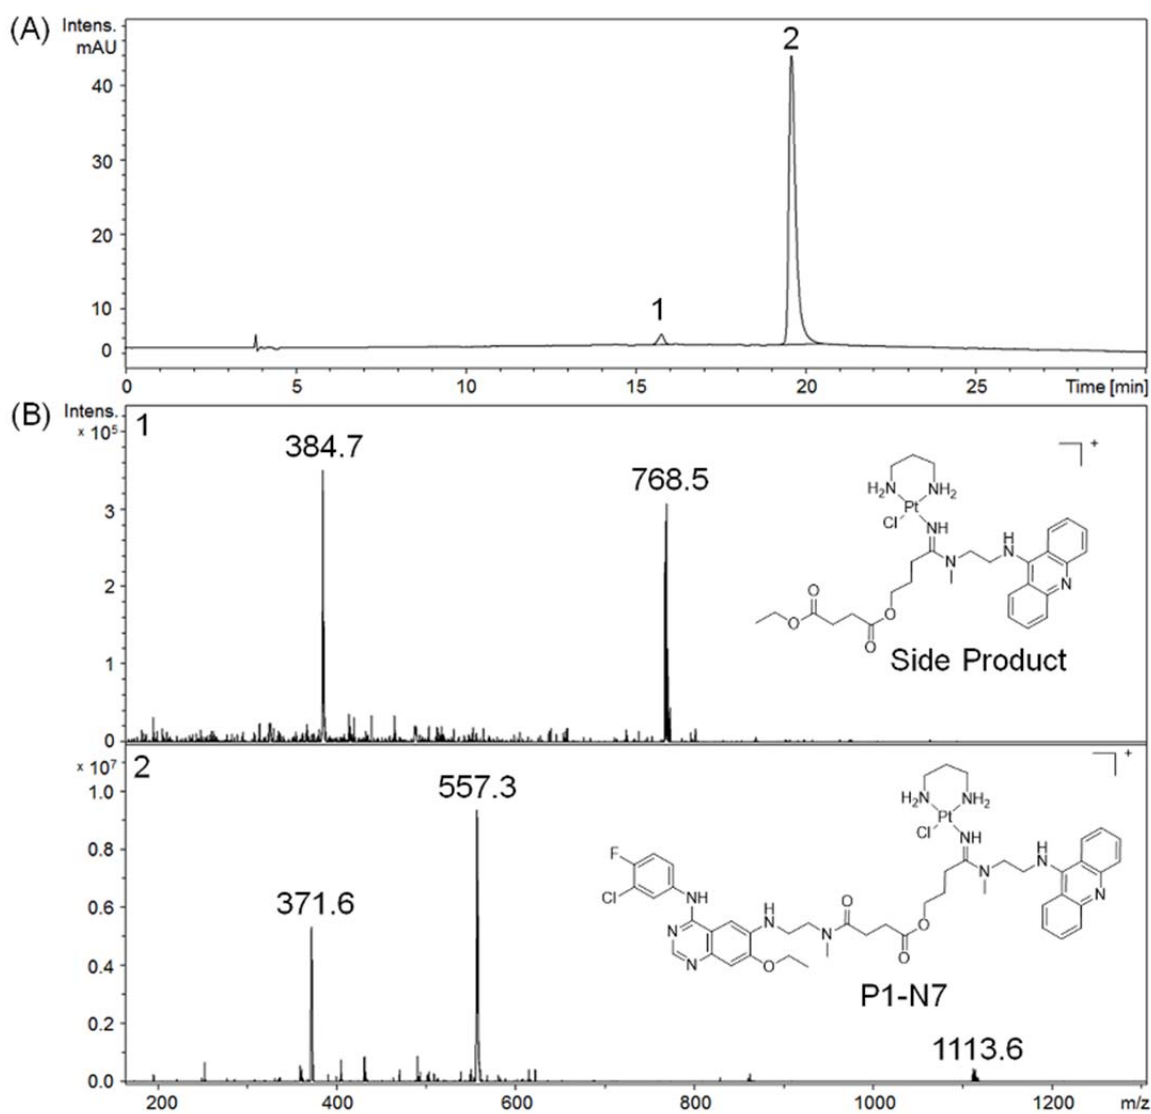

**Figure S18.** (A) Reverse-phase HPLC trace for the reaction of **P1** and **N7**. (B) ESMS spectrum recorded in positive-ion mode. Characteristic molecular and fragment ions for **P1-N7** are  $m/z$   $[M]^+$  1113.6,  $[M+H]^{2+}$  557.3,  $[M+2H]^{3+}$  371.6.

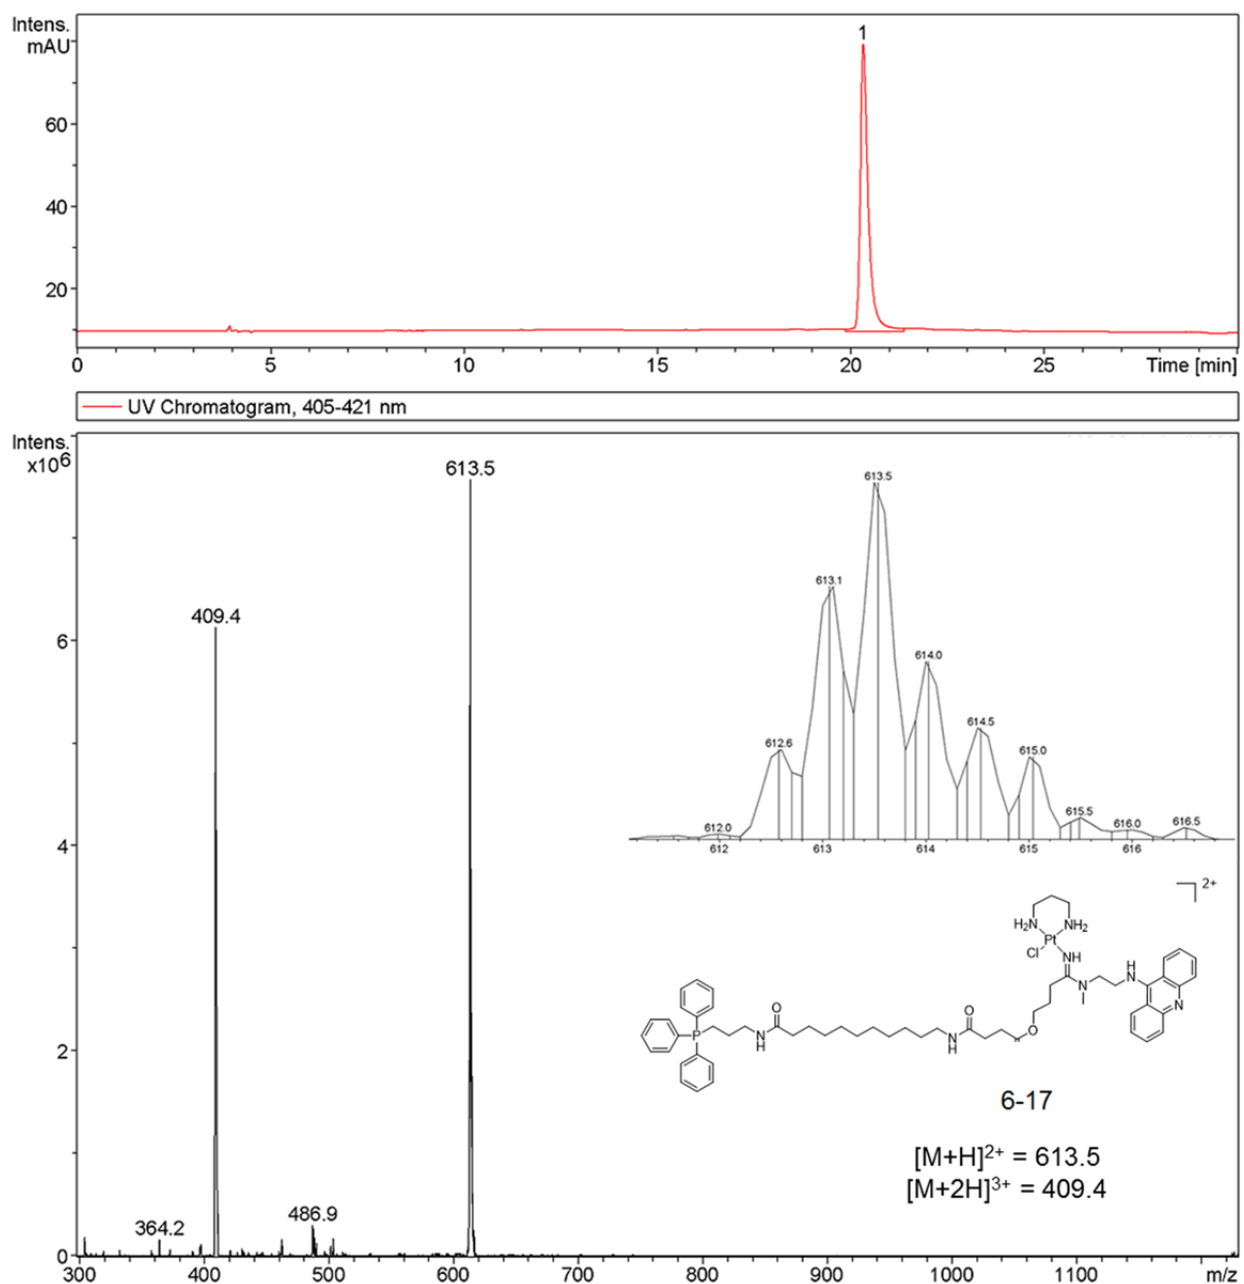

**Figure S19.** LC-MS analysis of the reaction mixture for the preparation of **P1-N9**.

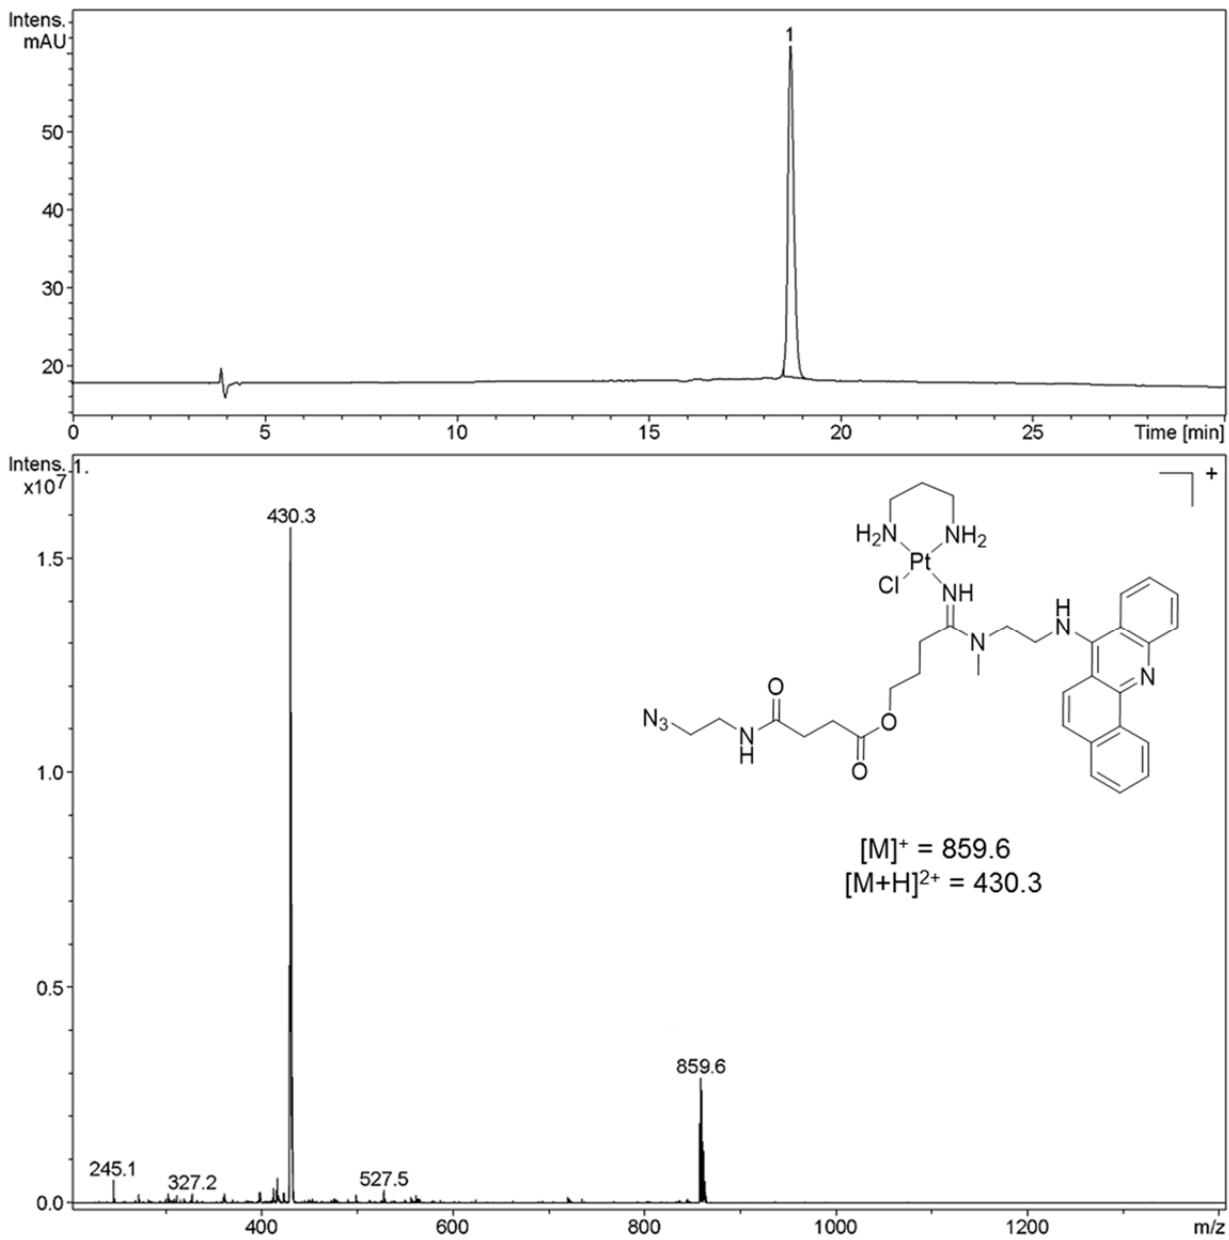

**Figure S20.** LC-MS analysis of the reaction mixture for the preparation of **P2-N1**.

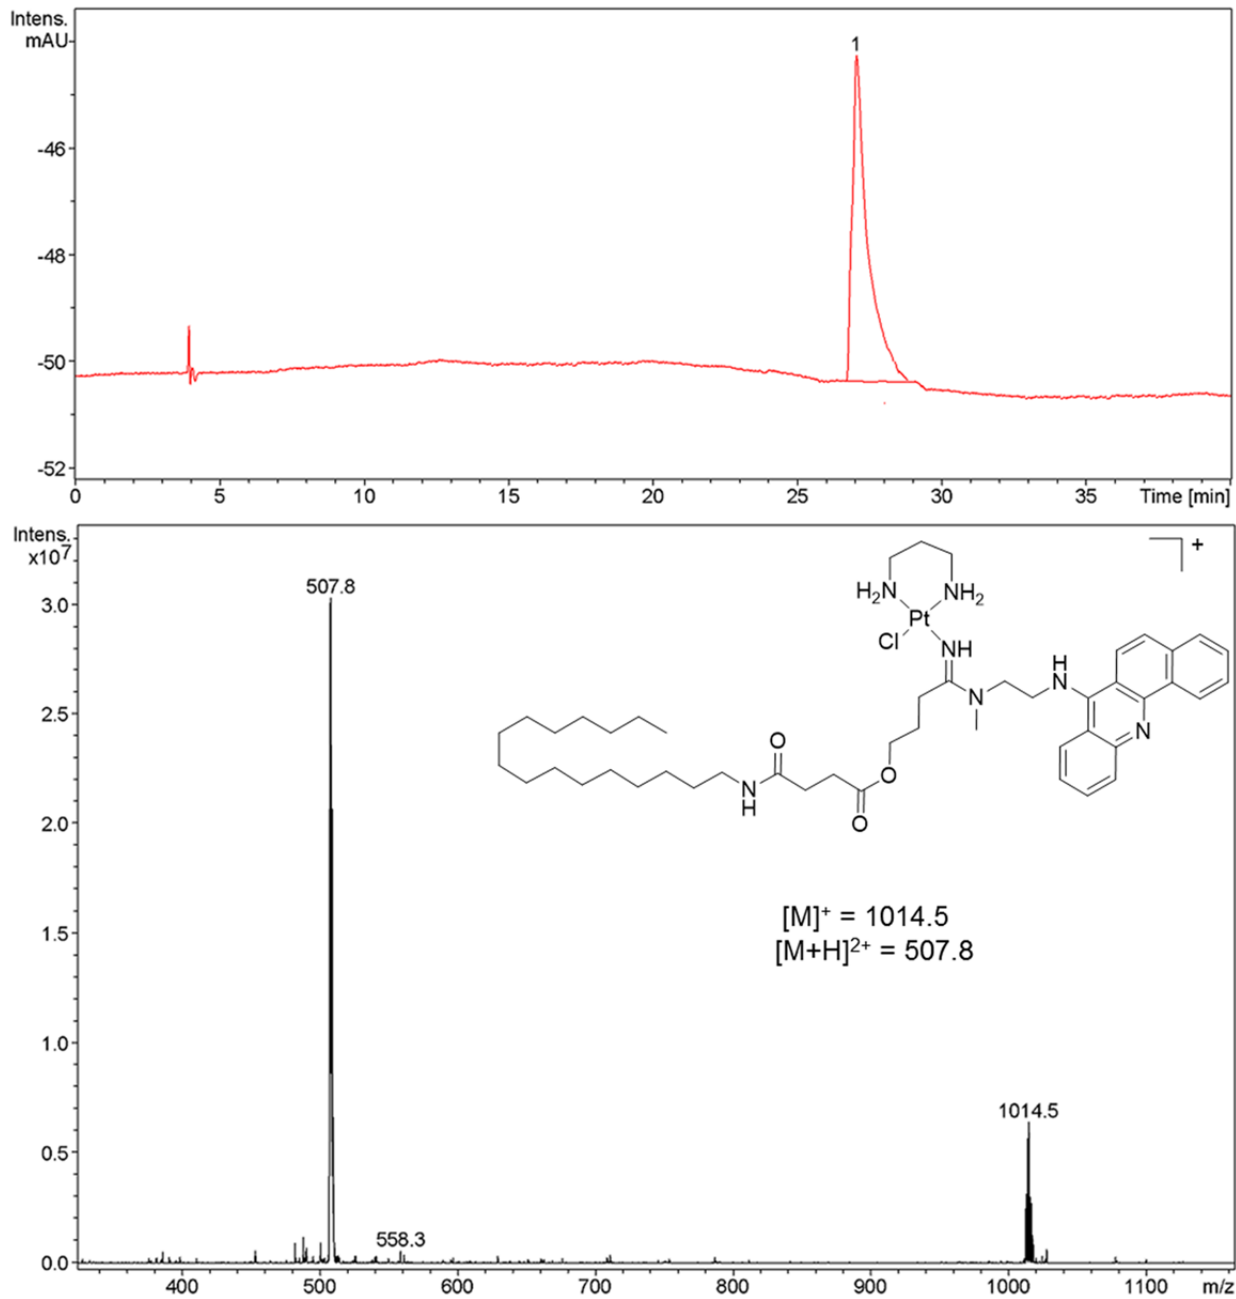

**Figure S21.** LC-MS analysis of the reaction mixture for the preparation of **P2-N2**.

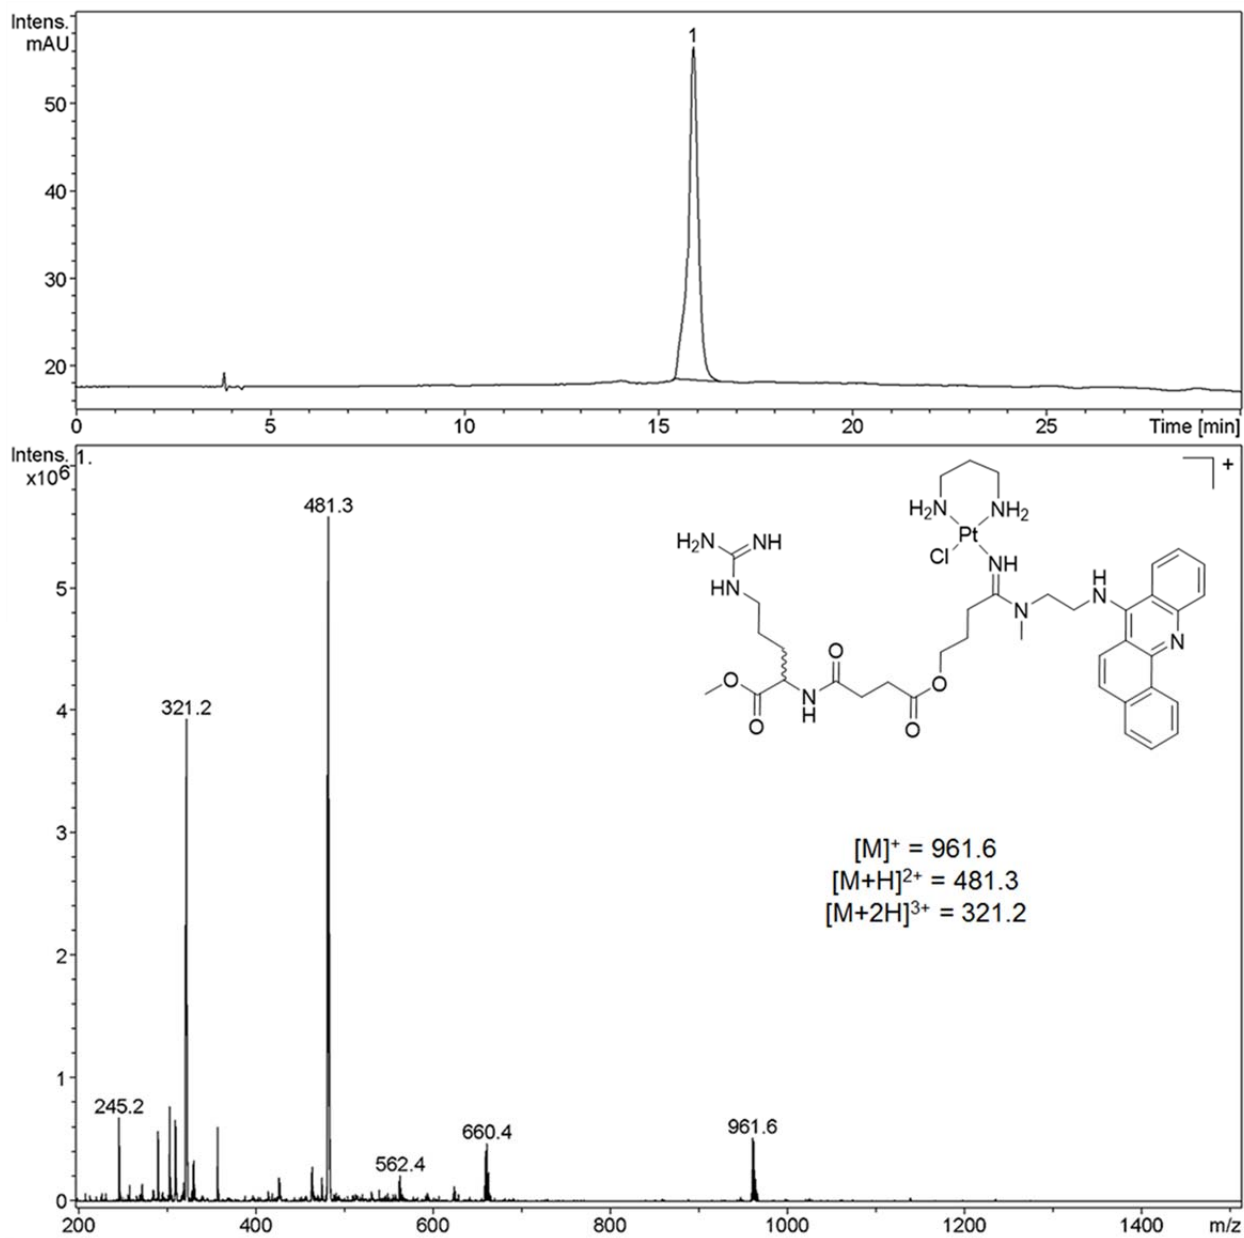

**Figure S22.** LC-MS analysis of the reaction mixture for the preparation of P2-N4.



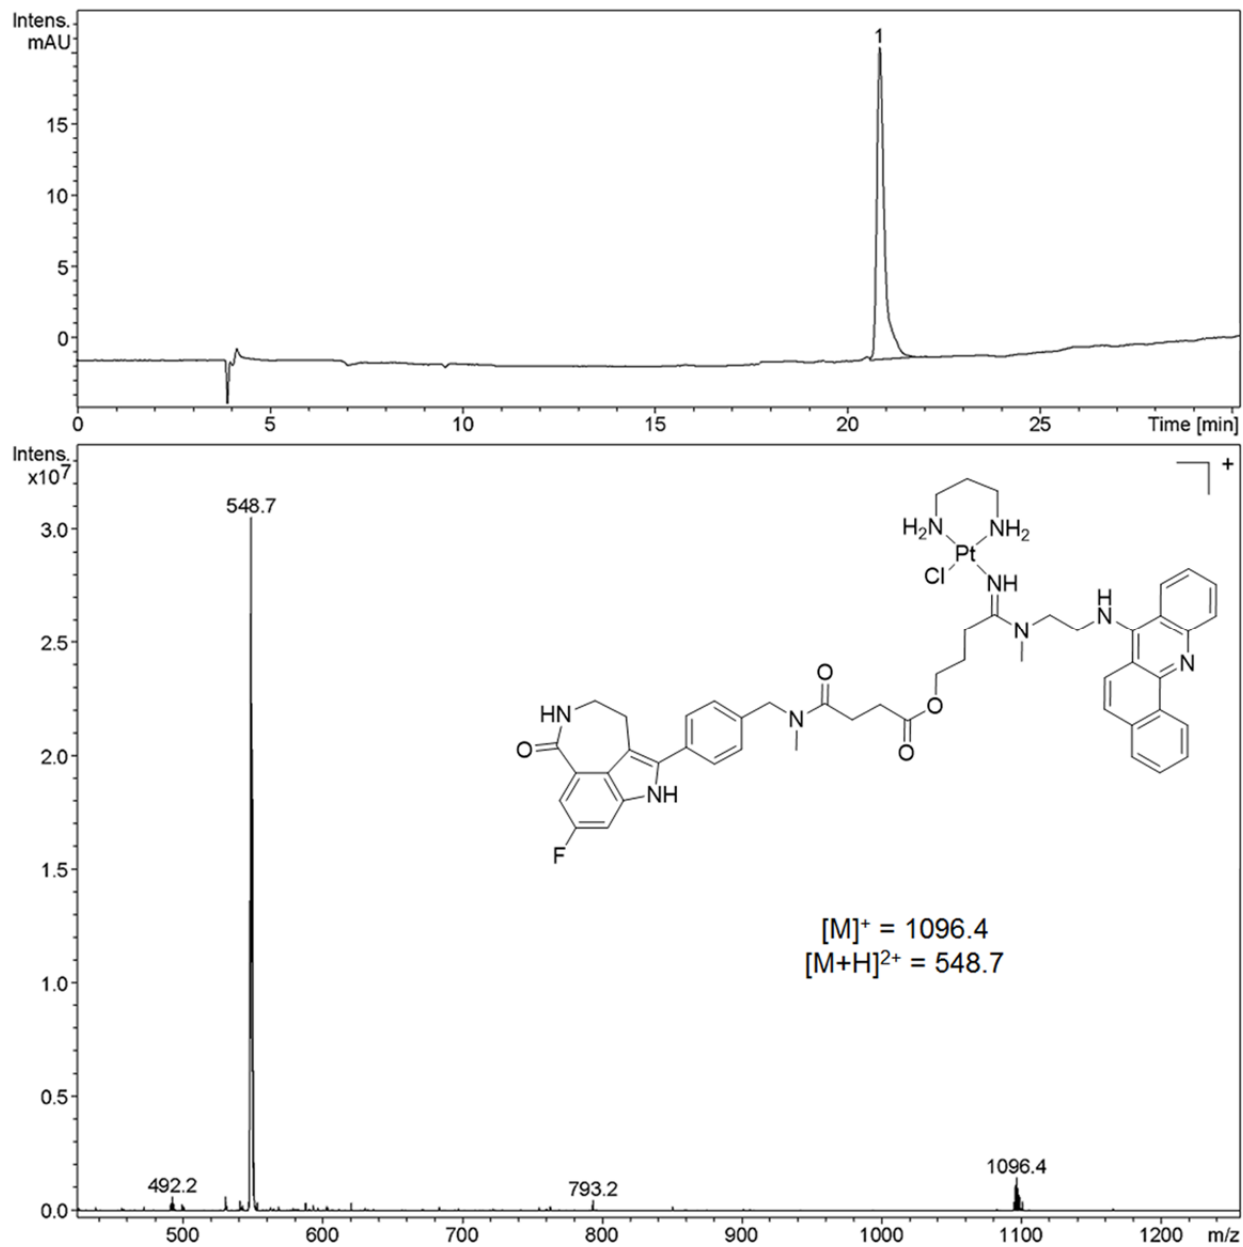

**Figure S23.** LC-MS analysis of the reaction mixture for the preparation of **P2-N5**.

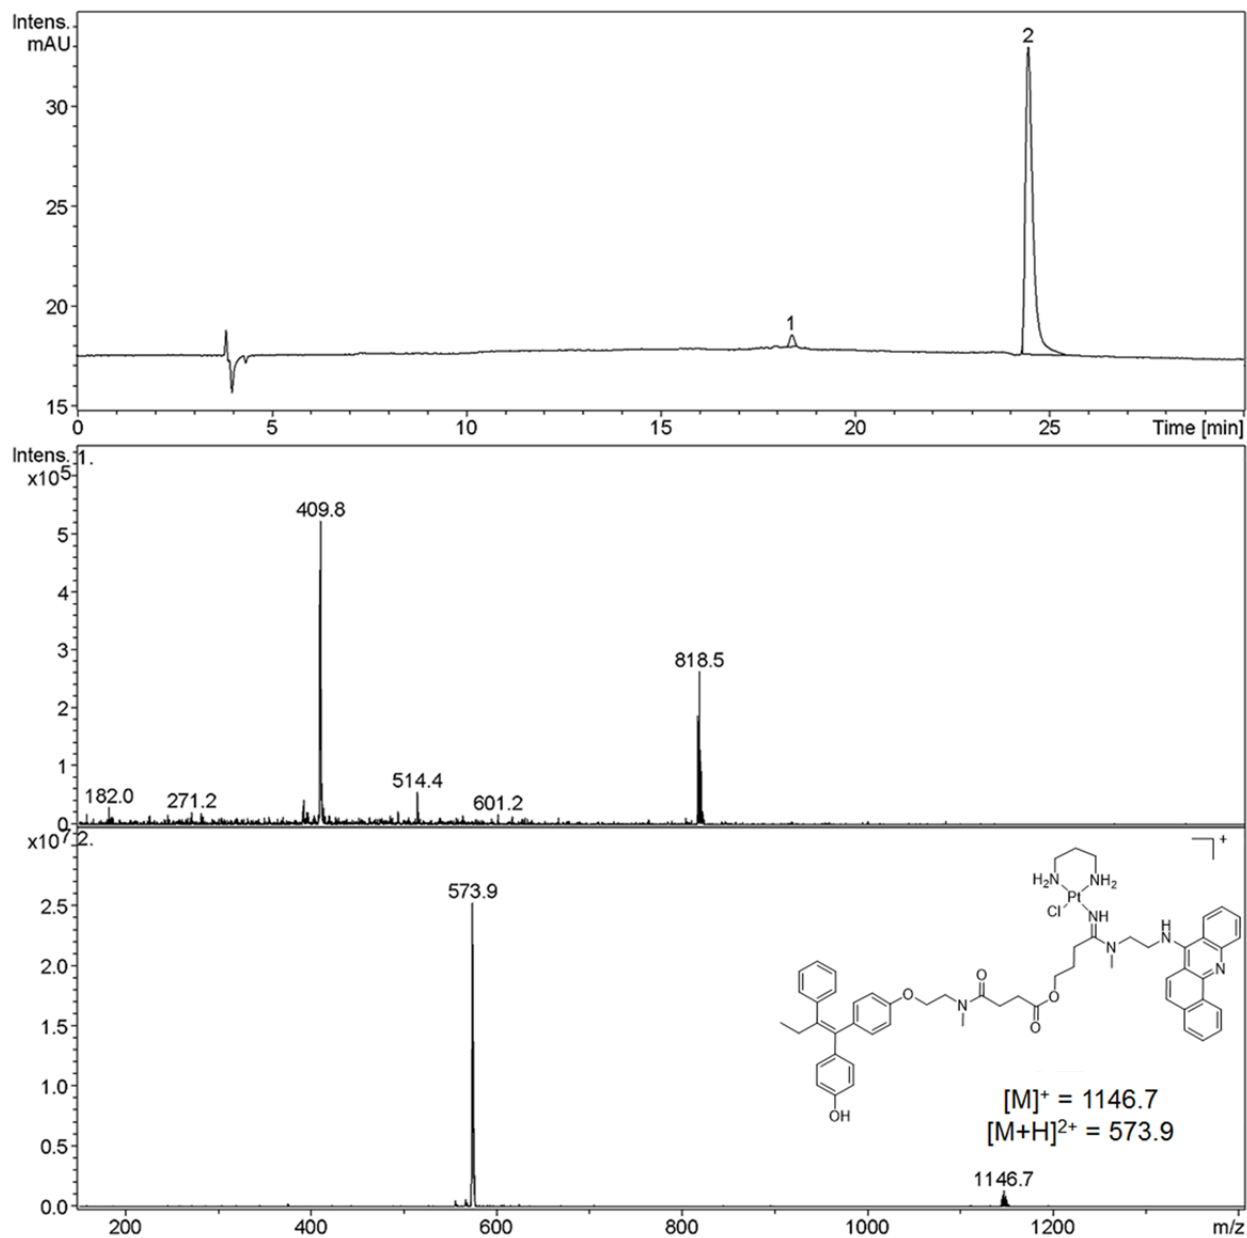

**Figure S24.** LC-MS analysis of the reaction mixture for the preparation of **P2-N6**.

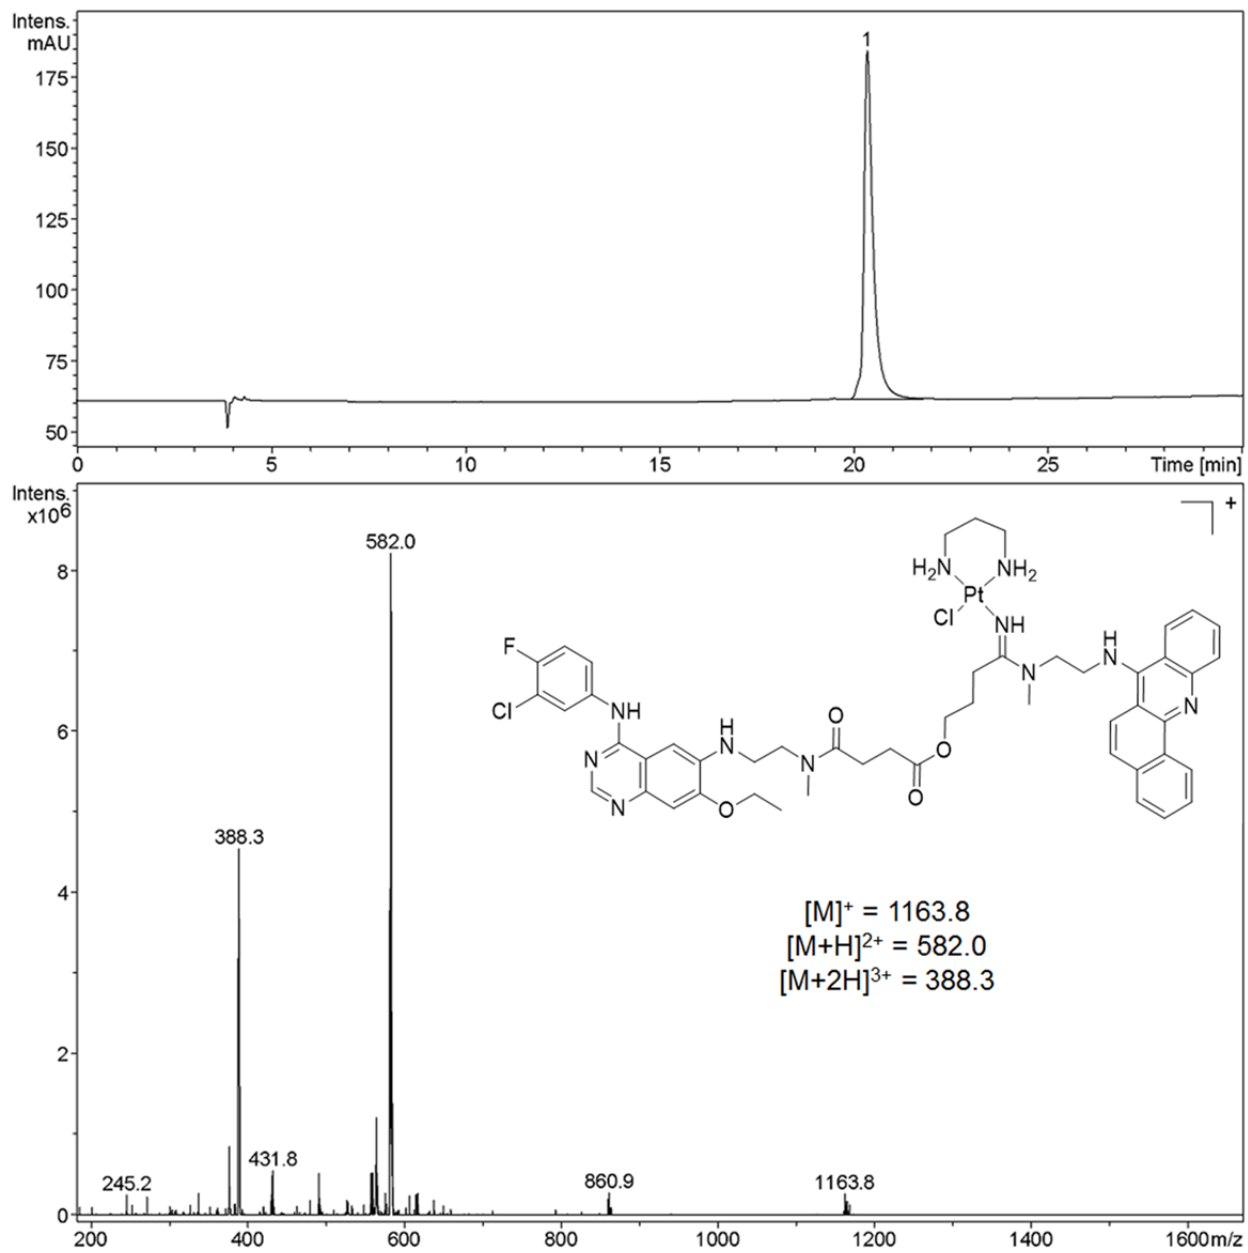

**Figure S25.** LC-MS analysis of the reaction mixture for the preparation of **P2-N7**.

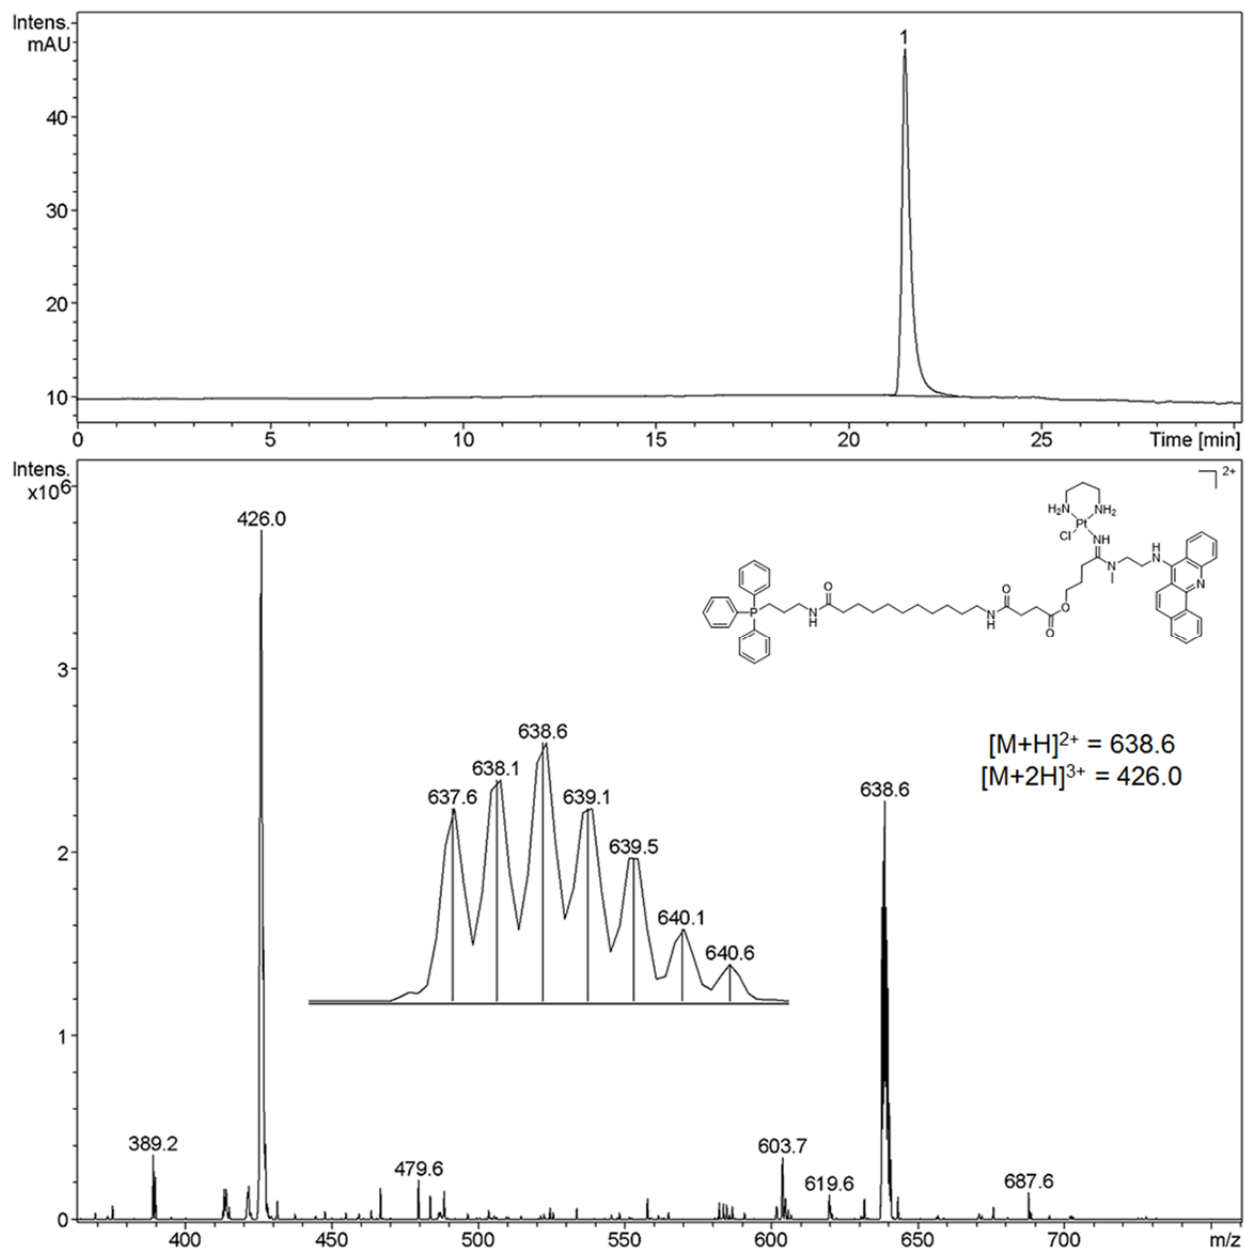

**Figure S26.** LC-MS analysis of the reaction mixture for the preparation of **P2-N9**.

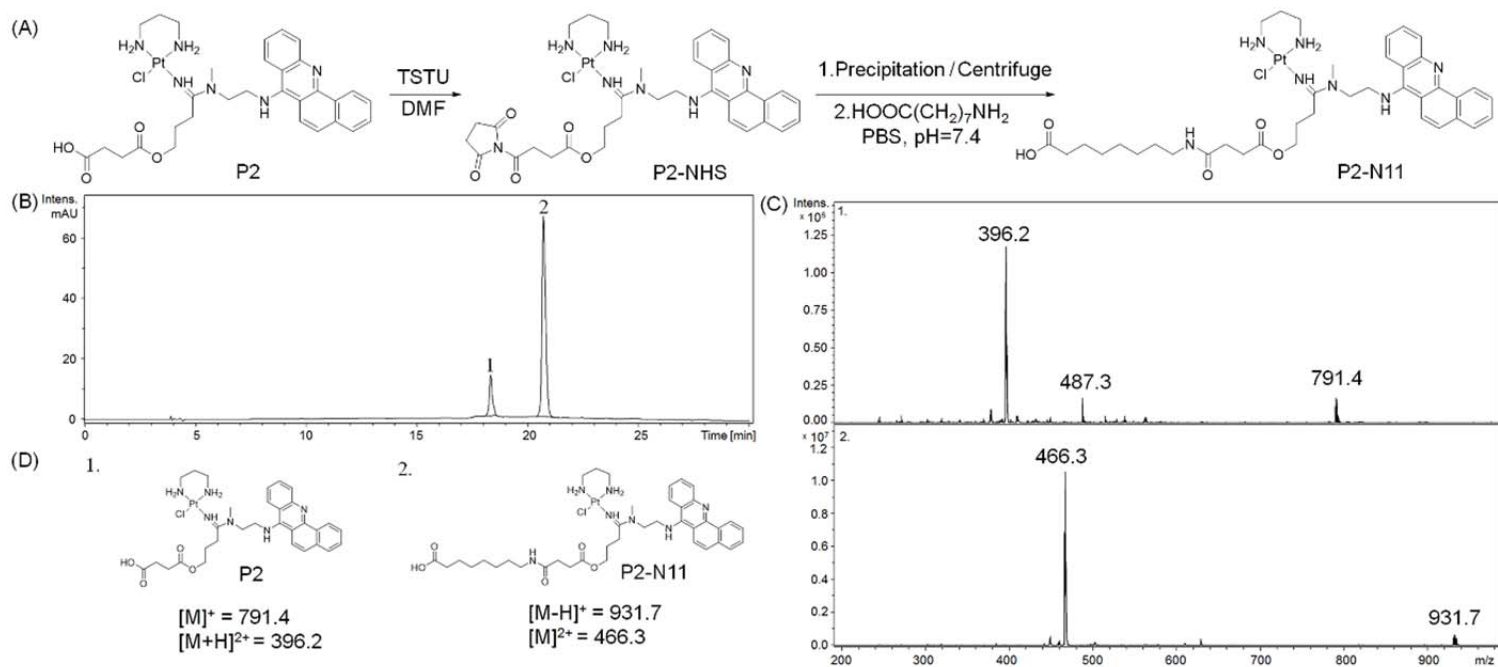

**Figure S27.** (A) “Two-step” synthesis of platinum-acridine conjugates under aqueous conditions. (B) Reverse-phase HPLC trace of the reaction mixture for the preparation of **P2-N11**. (C) ESMS spectrum of **P2** and target conjugate **P2-N11** recorded in positive-ion mode. (D) Structures and characteristic molecular ions and fragment ions ( $m/z$ ) for **P2** and **P2-N11**.

## S.4. LC-MS ANALYSIS OF ESTER REACTIVITY

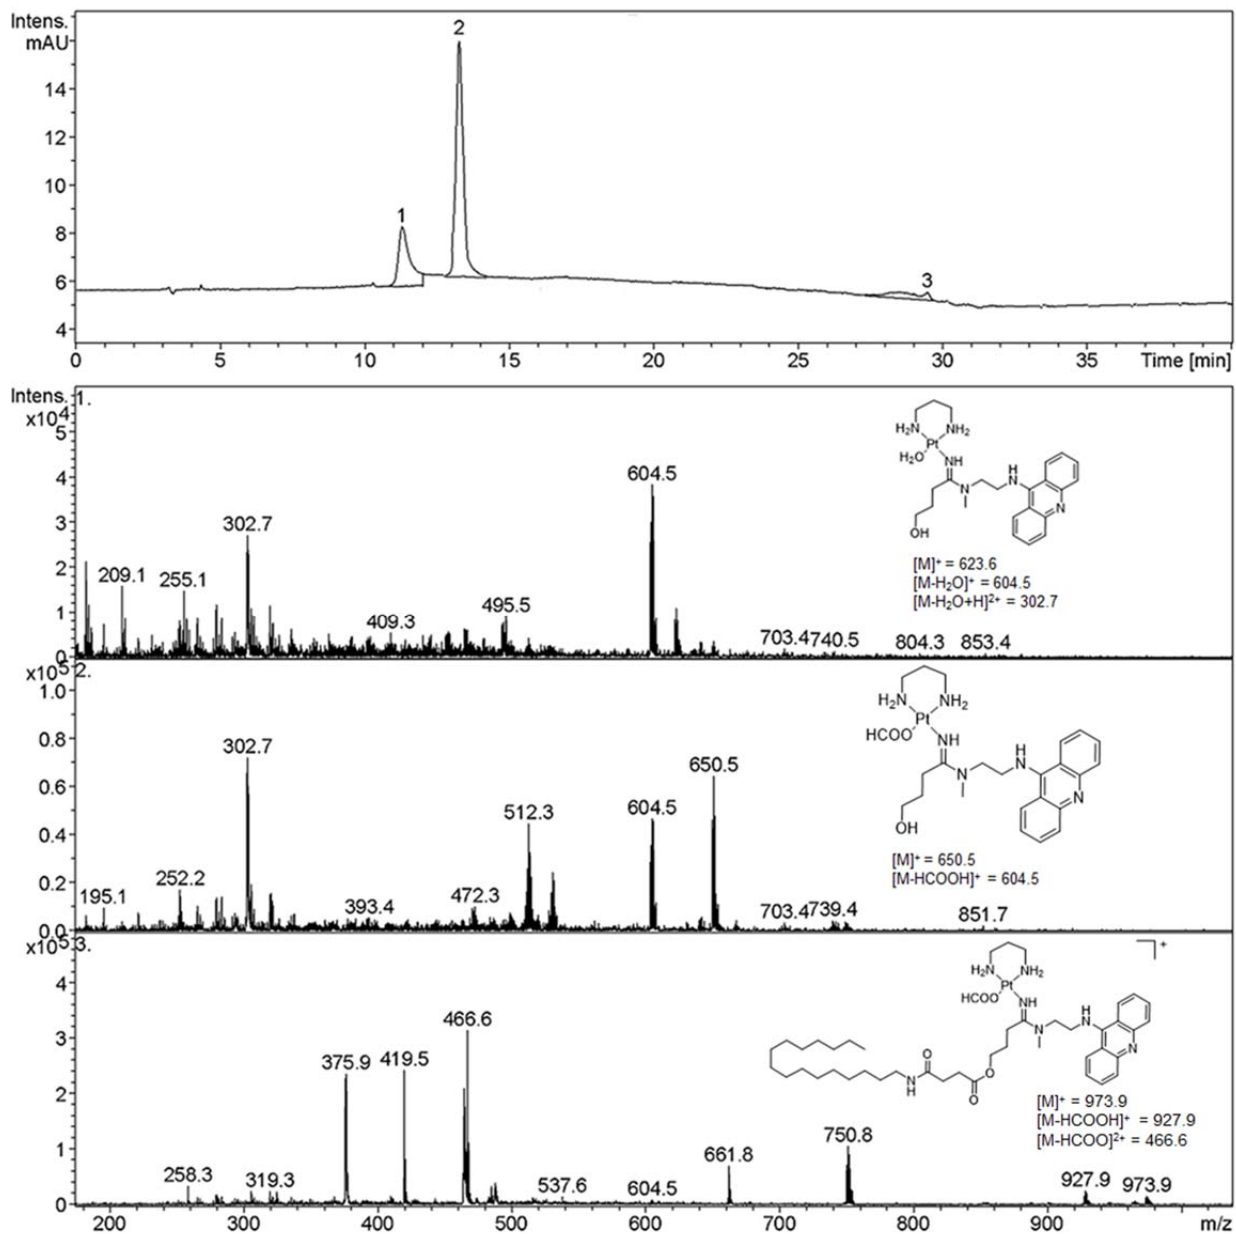

**Figure S28.** LC-ESMS analysis of the mixture of compound P1-N2 in phosphate buffer (PB, pH 7.4) incubated at 37 °C.

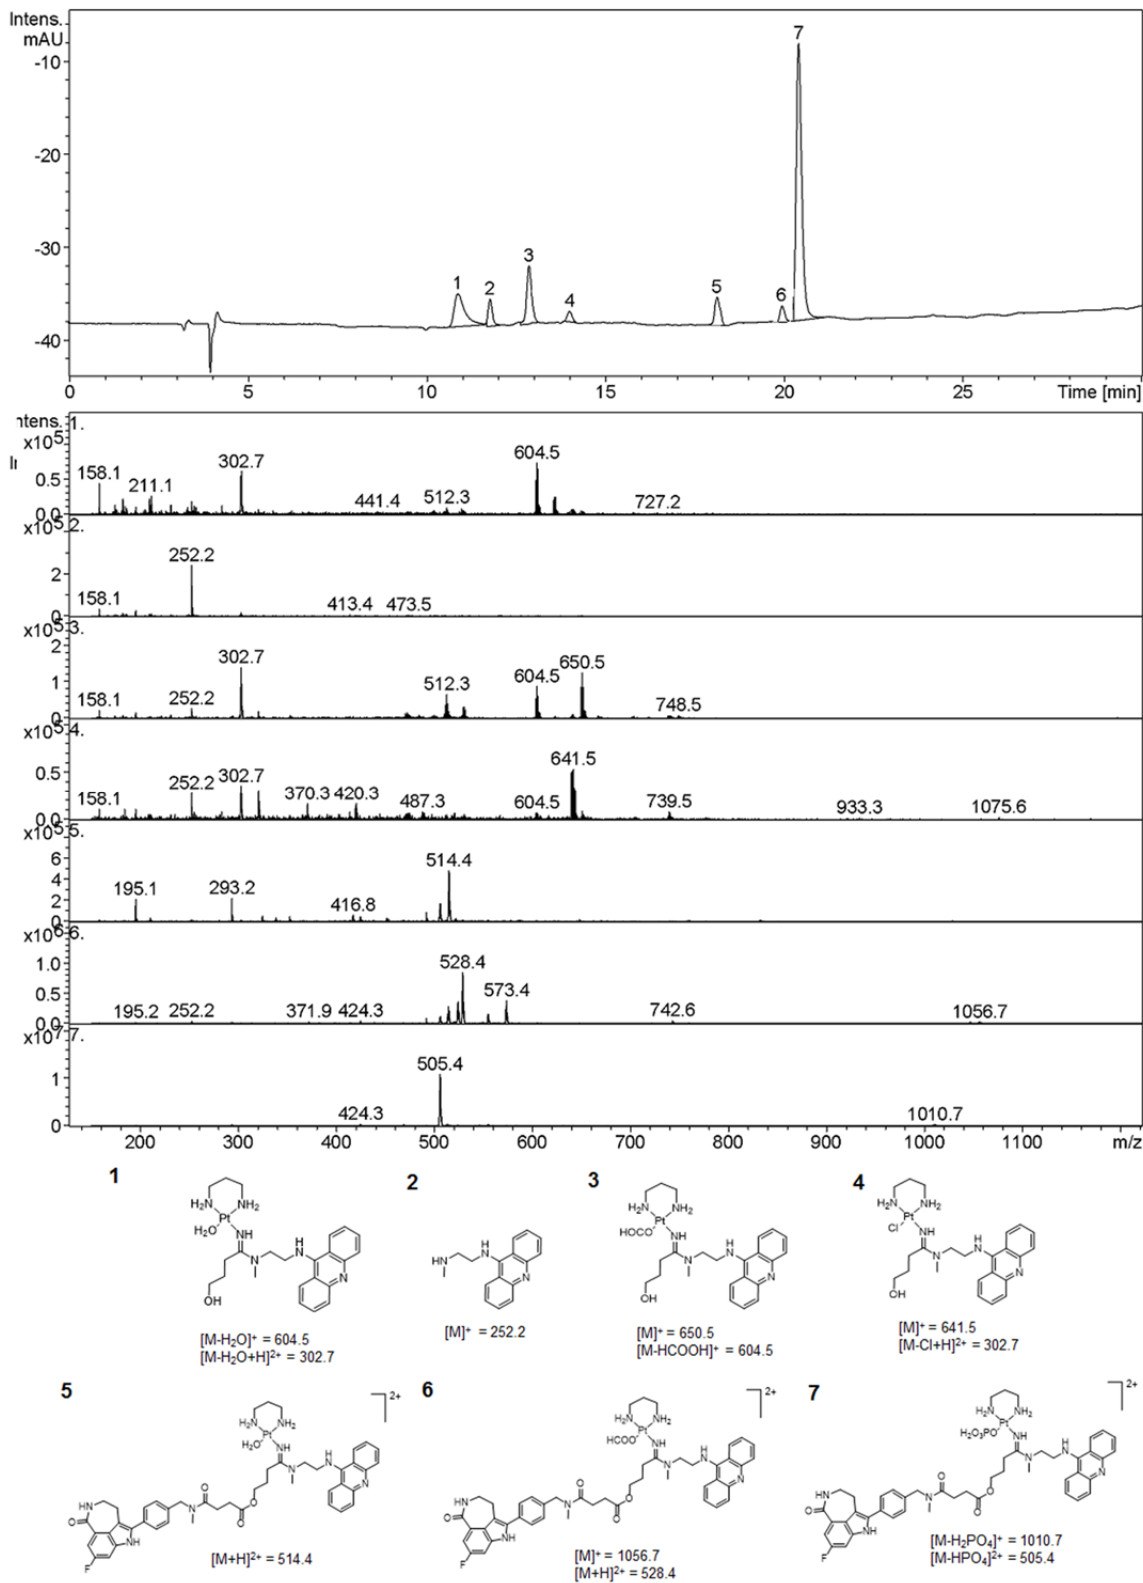

**Figure S29.** LC-ESMS analysis of the mixture of compound **P1-N5** in phosphate buffer (PB, pH 7.4) incubated at 37 °C.

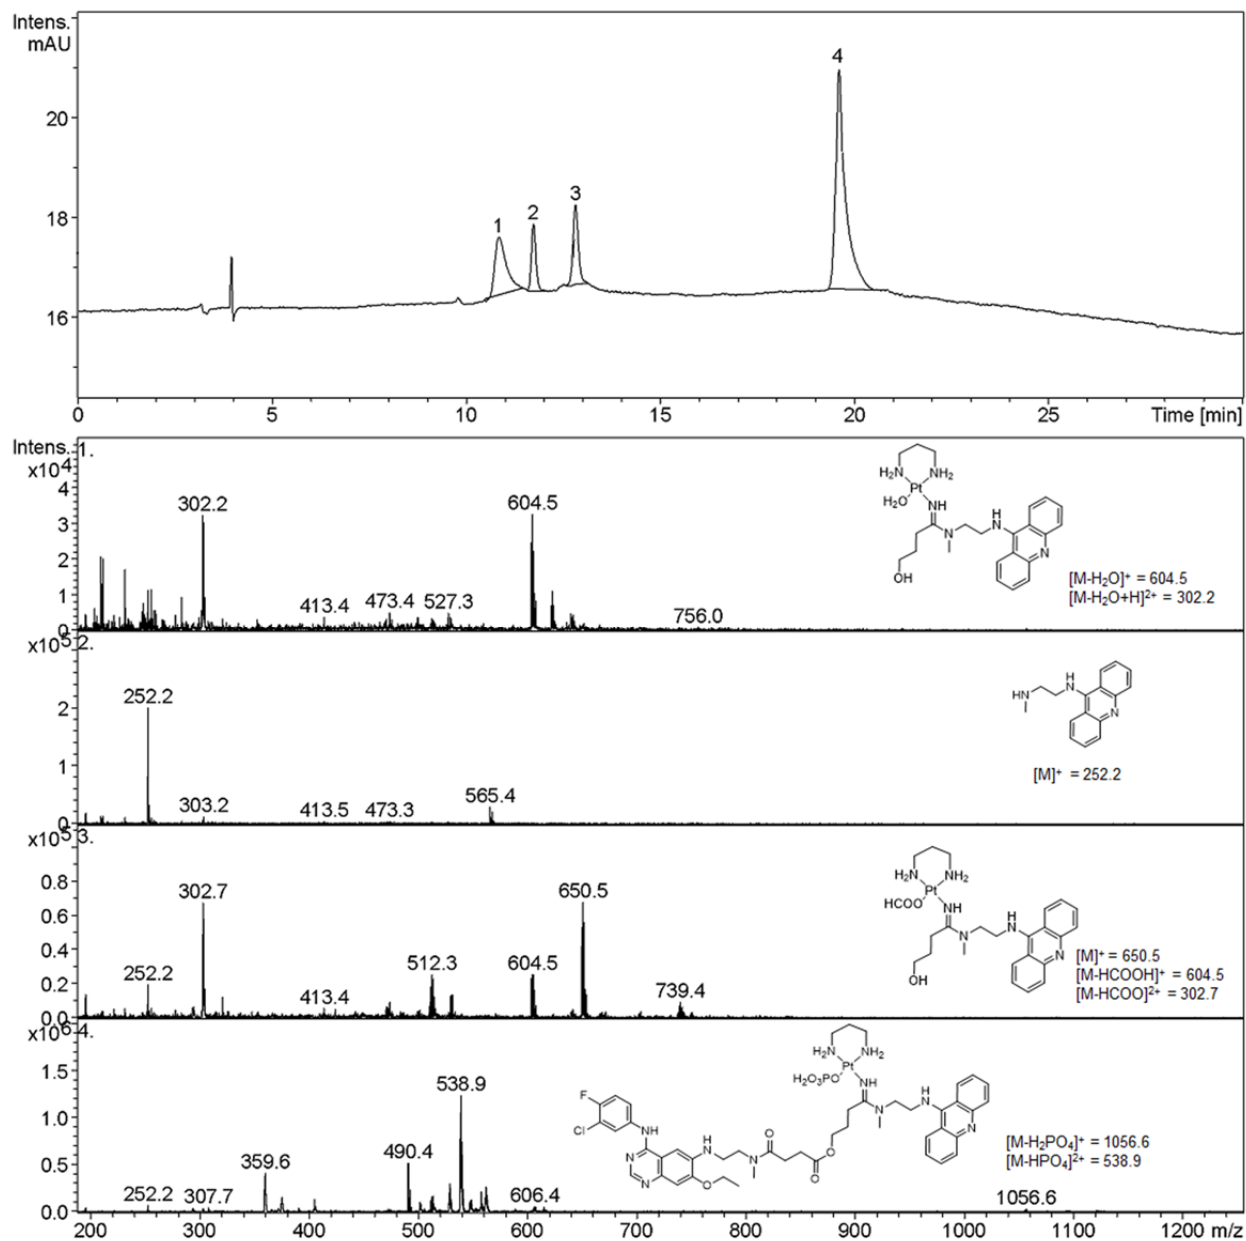

**Figure S30.** LC-ESMS analysis of the mixture of compound **P1-N7** in phosphate buffer (PB, pH 7.4) incubated at 37 °C.



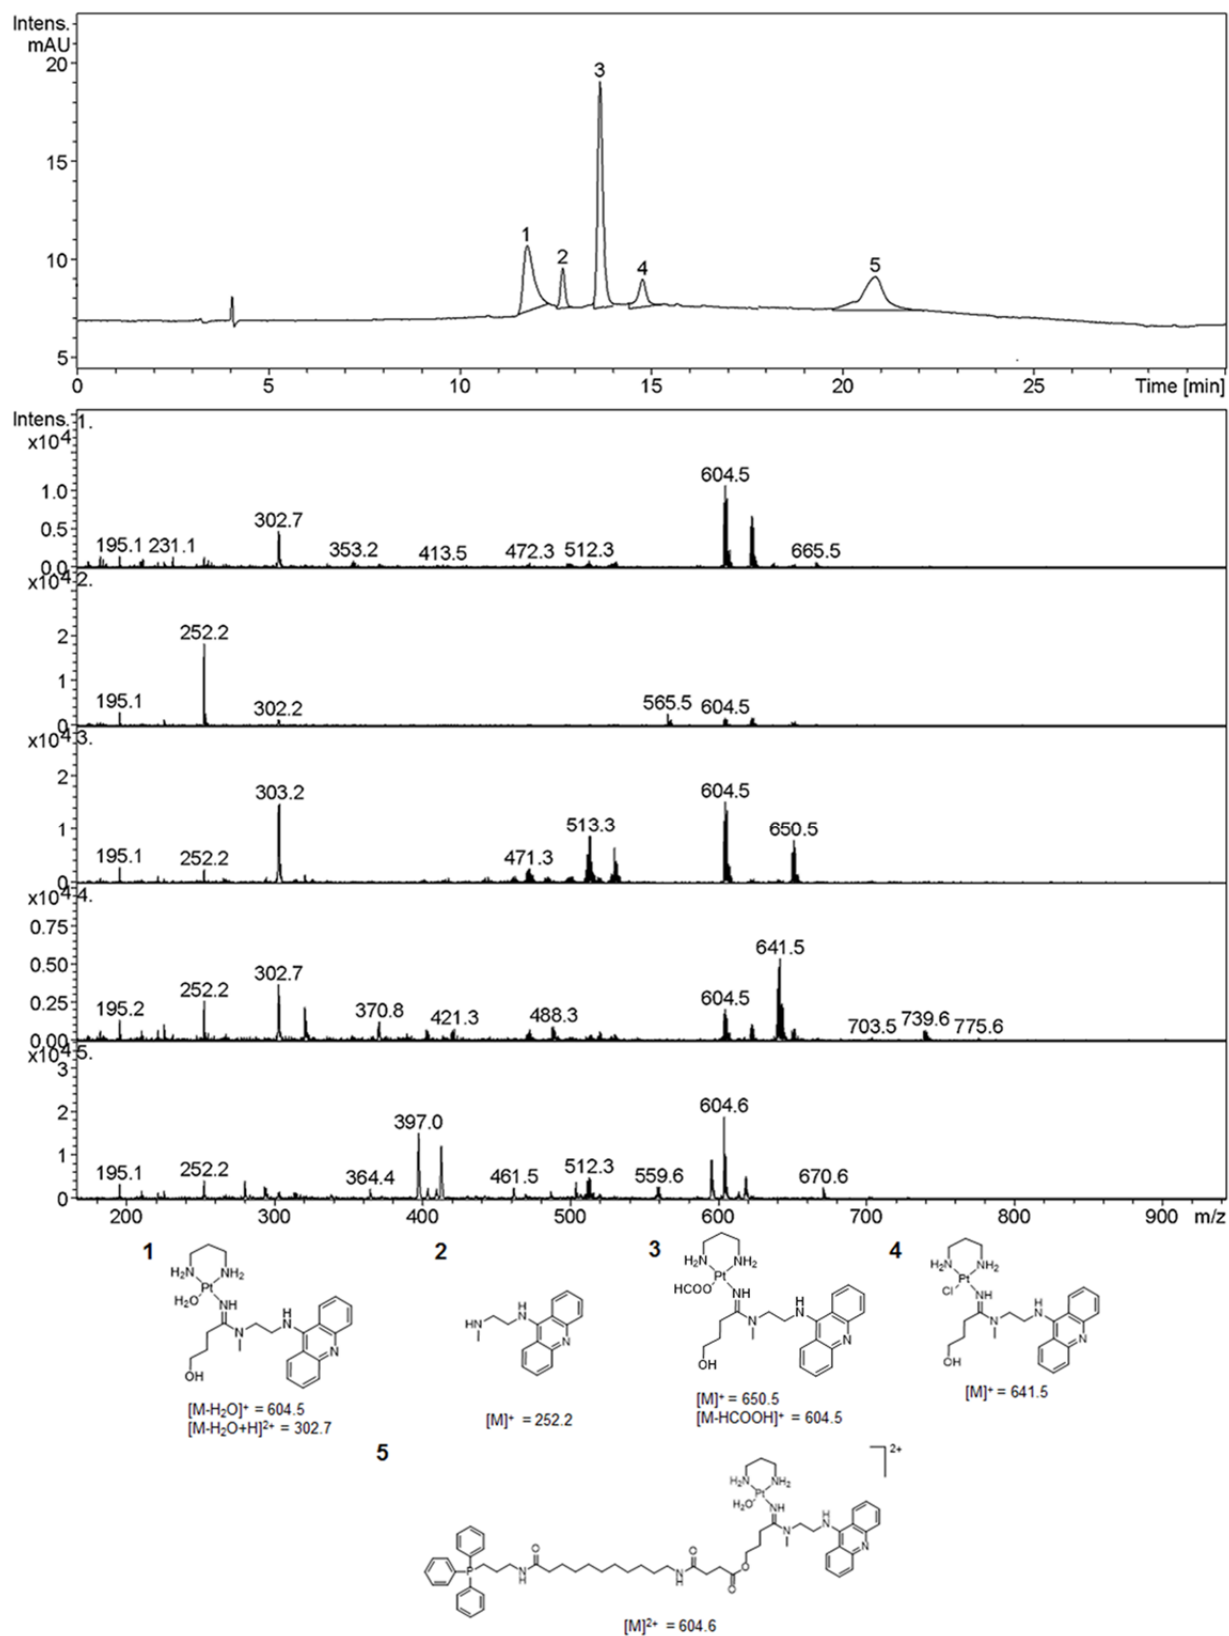

**Figure S31.** LC-ESMS analysis of the mixture of compound **P1-N9** in phosphate buffer (PB, pH 7.4) incubated at 37 °C.

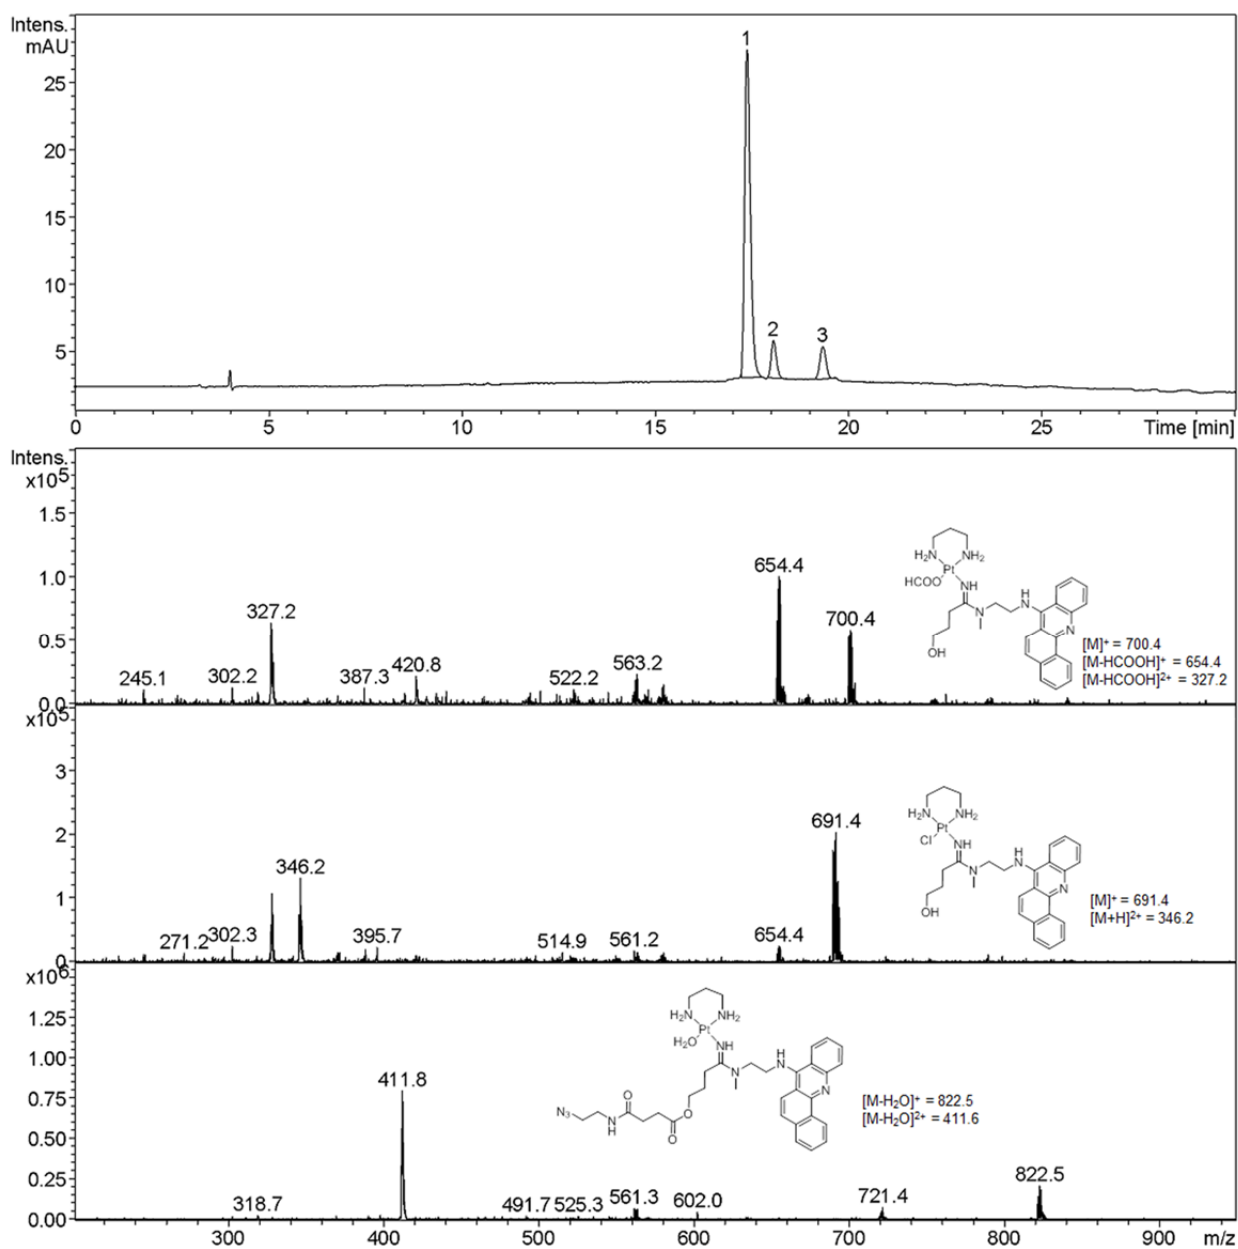

**Figure S32.** LC-ESMS analysis of the mixture of compound **P2-N1** in phosphate buffer (PB, pH 7.4) incubated at 37 °C.

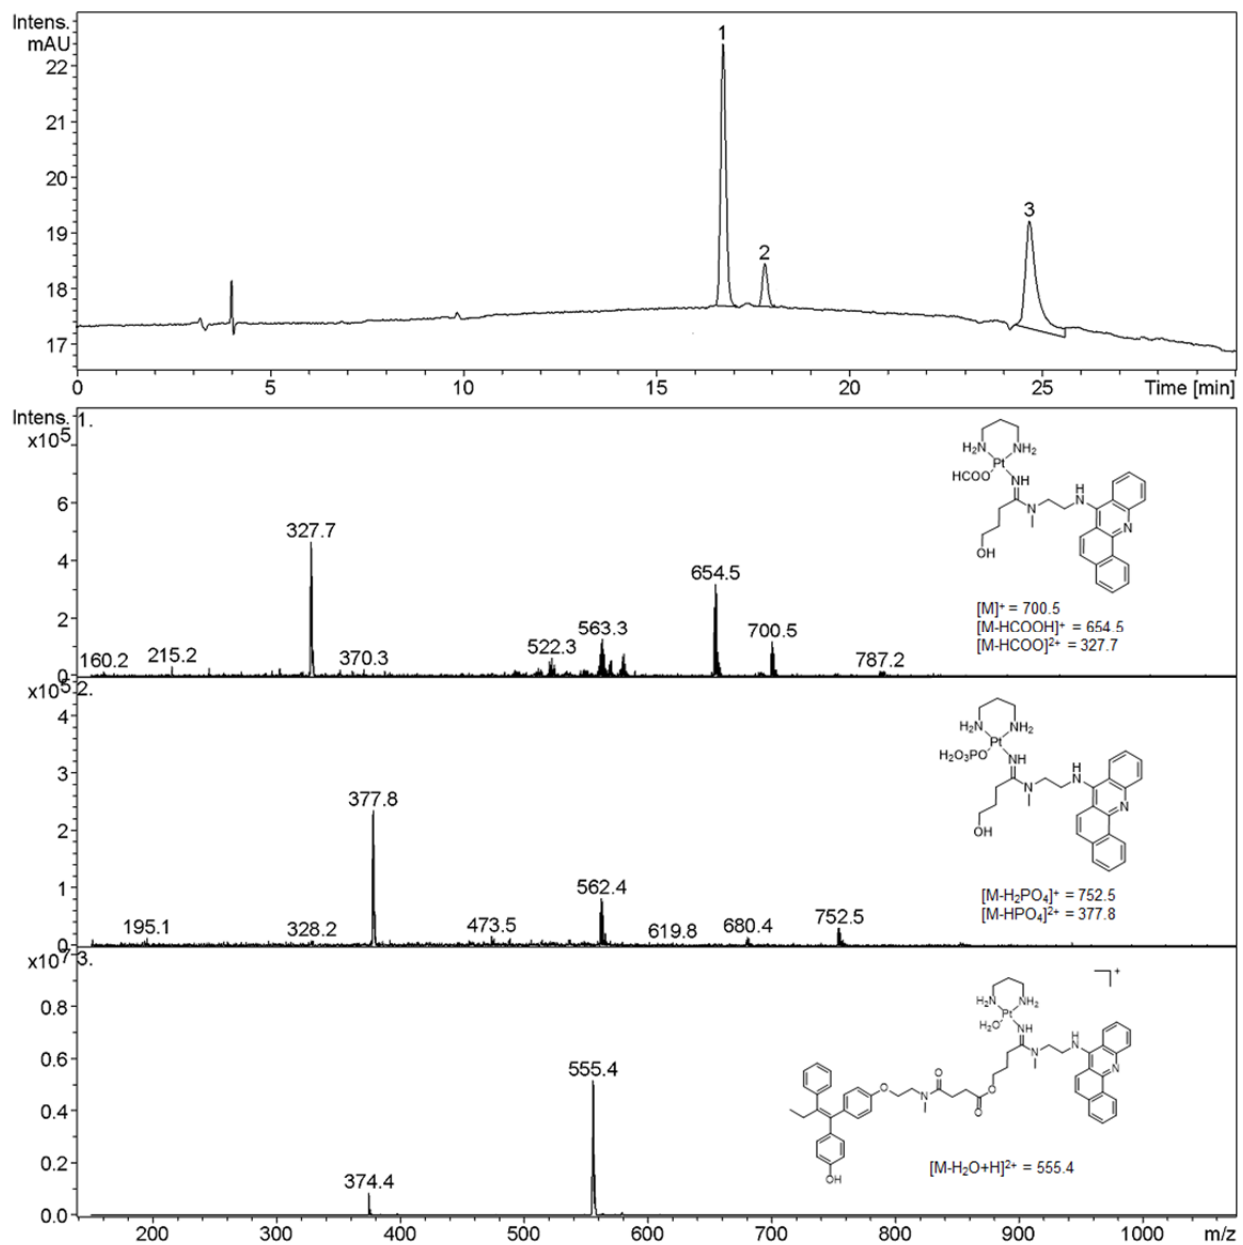

**Figure S33.** LC-ESMS analysis of the mixture of compound **P2-N6** in phosphate buffer (PB, pH 7.4) incubated at 37 °C.

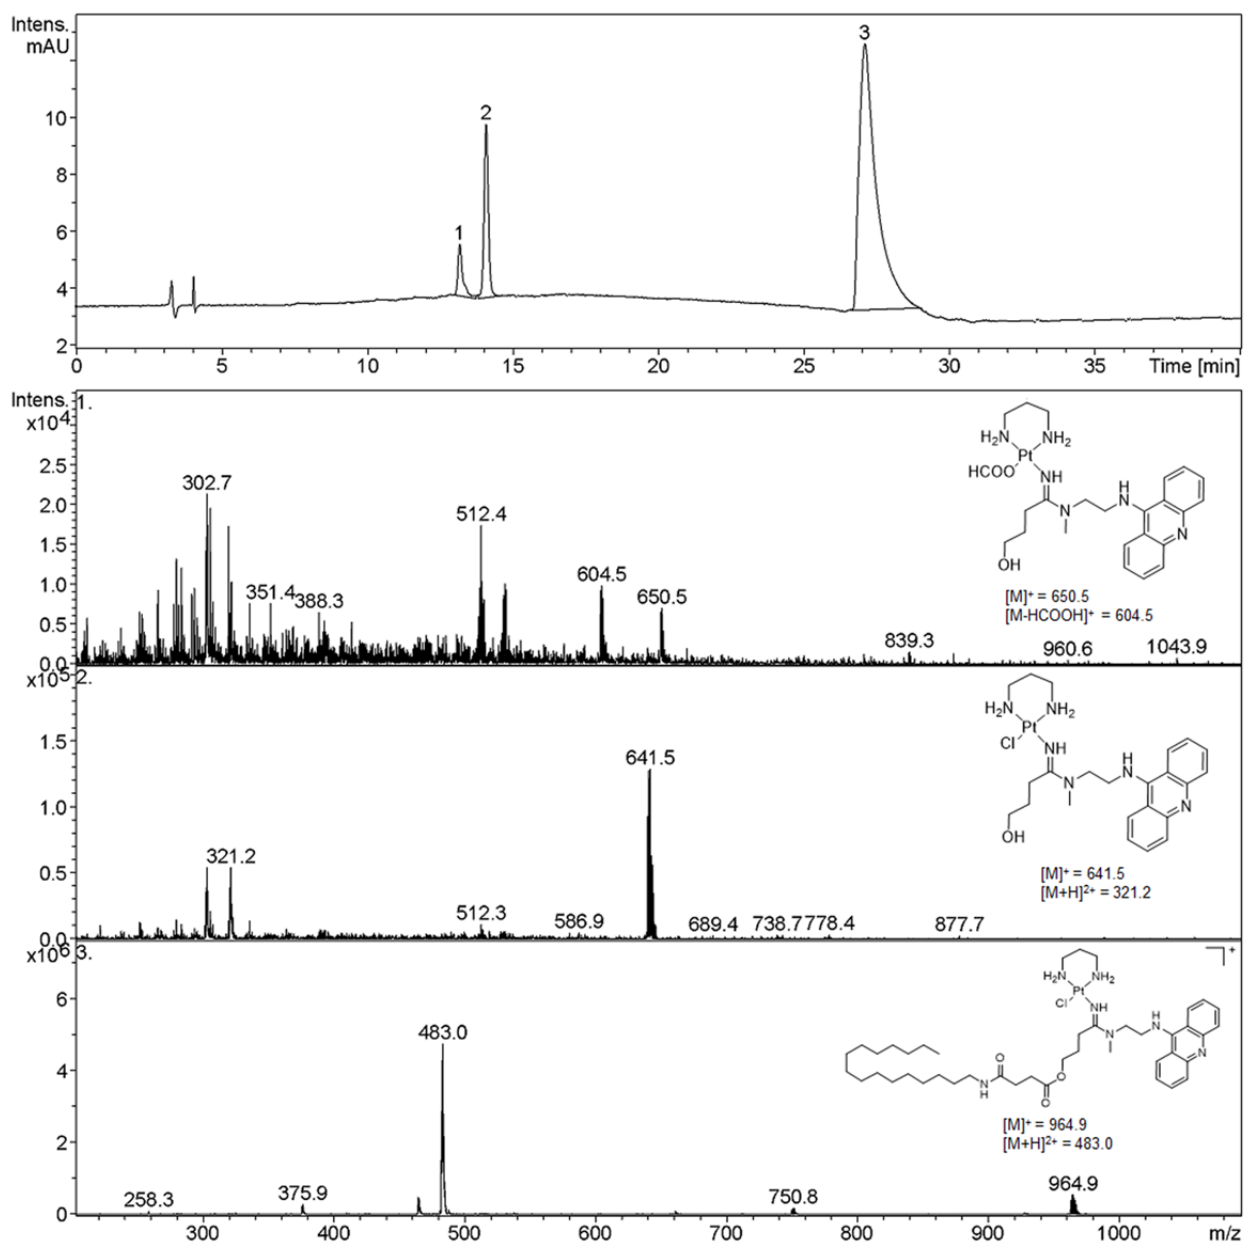

**Figure S34.** LC-ESMS analysis of the mixture of compound **P1-N2** in phosphate buffered saline (PBS, pH 7.4) incubated at 37 °C.

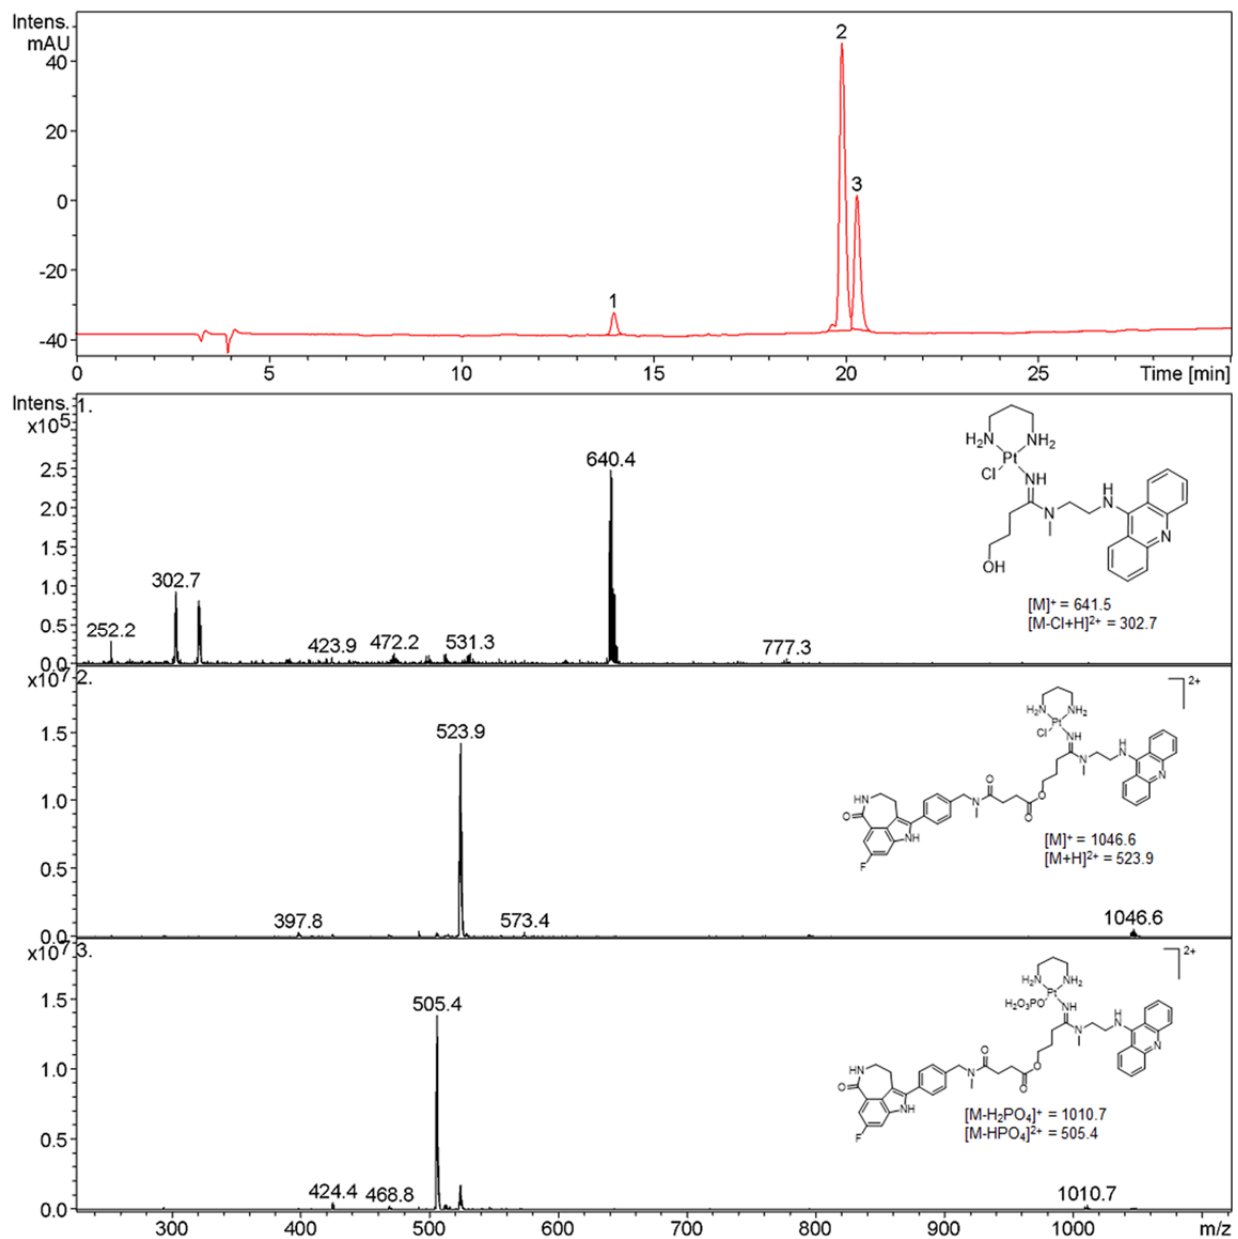

**Figure S35.** LC-ESMS analysis of the mixture of compound **P1-N5** in phosphate buffered saline (PBS, pH 7.4) incubated at 37 °C.

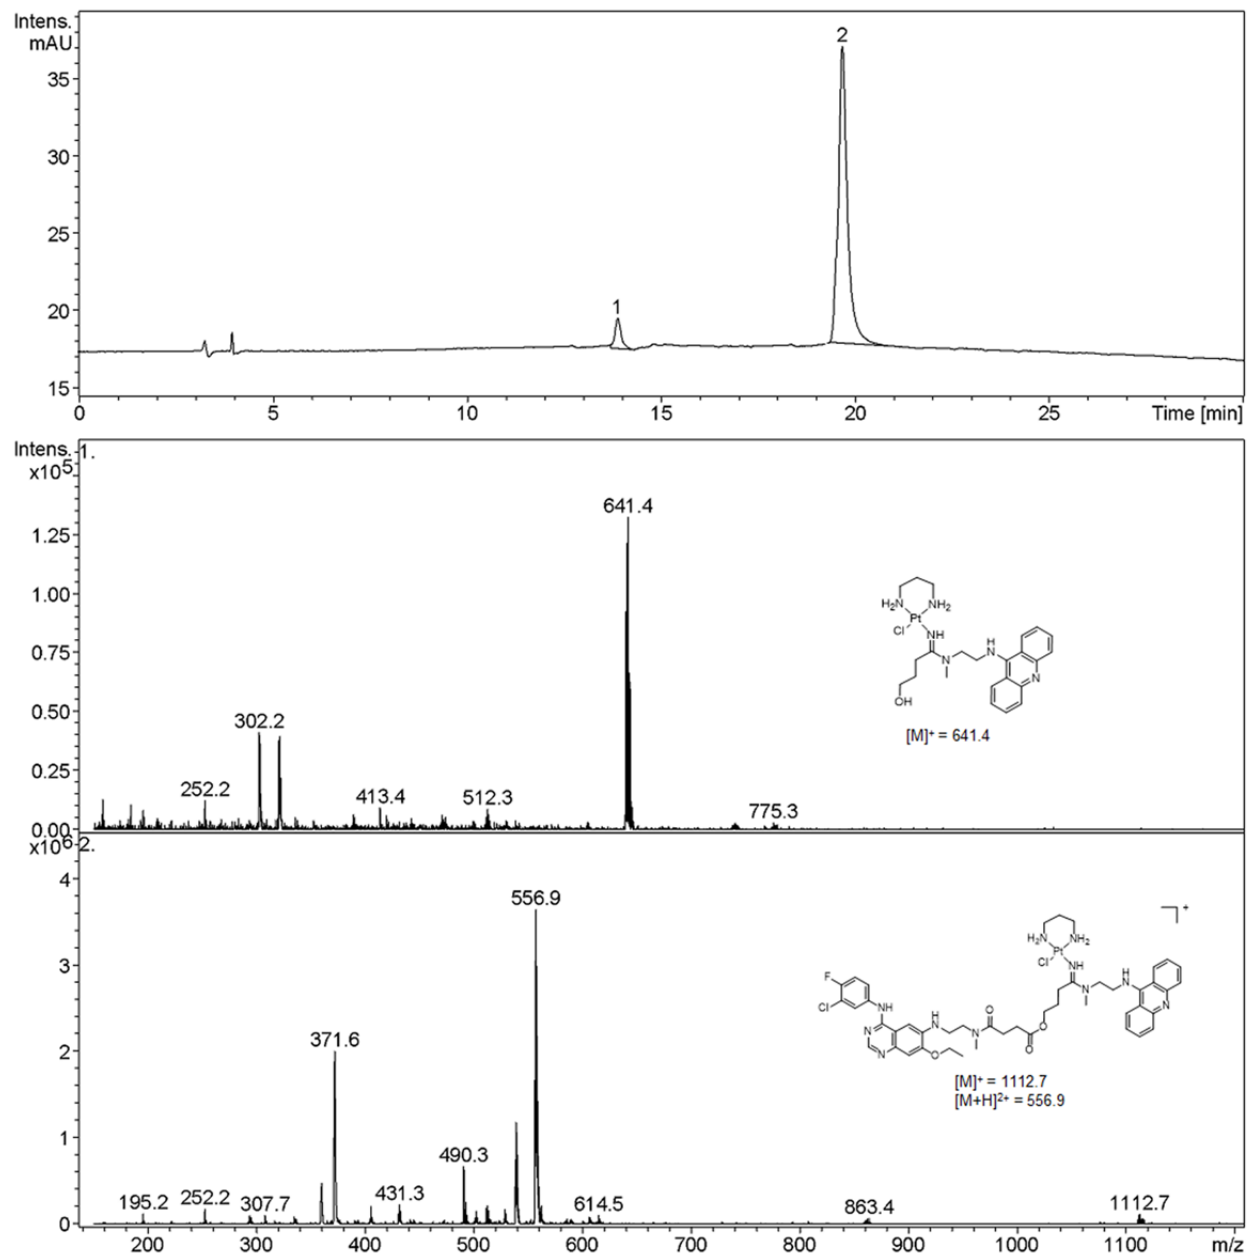

**Figure S36.** LC-ESMS analysis of the mixture of compound **P1-N7** in phosphate buffered saline (PBS, pH 7.4) incubated at 37 °C.

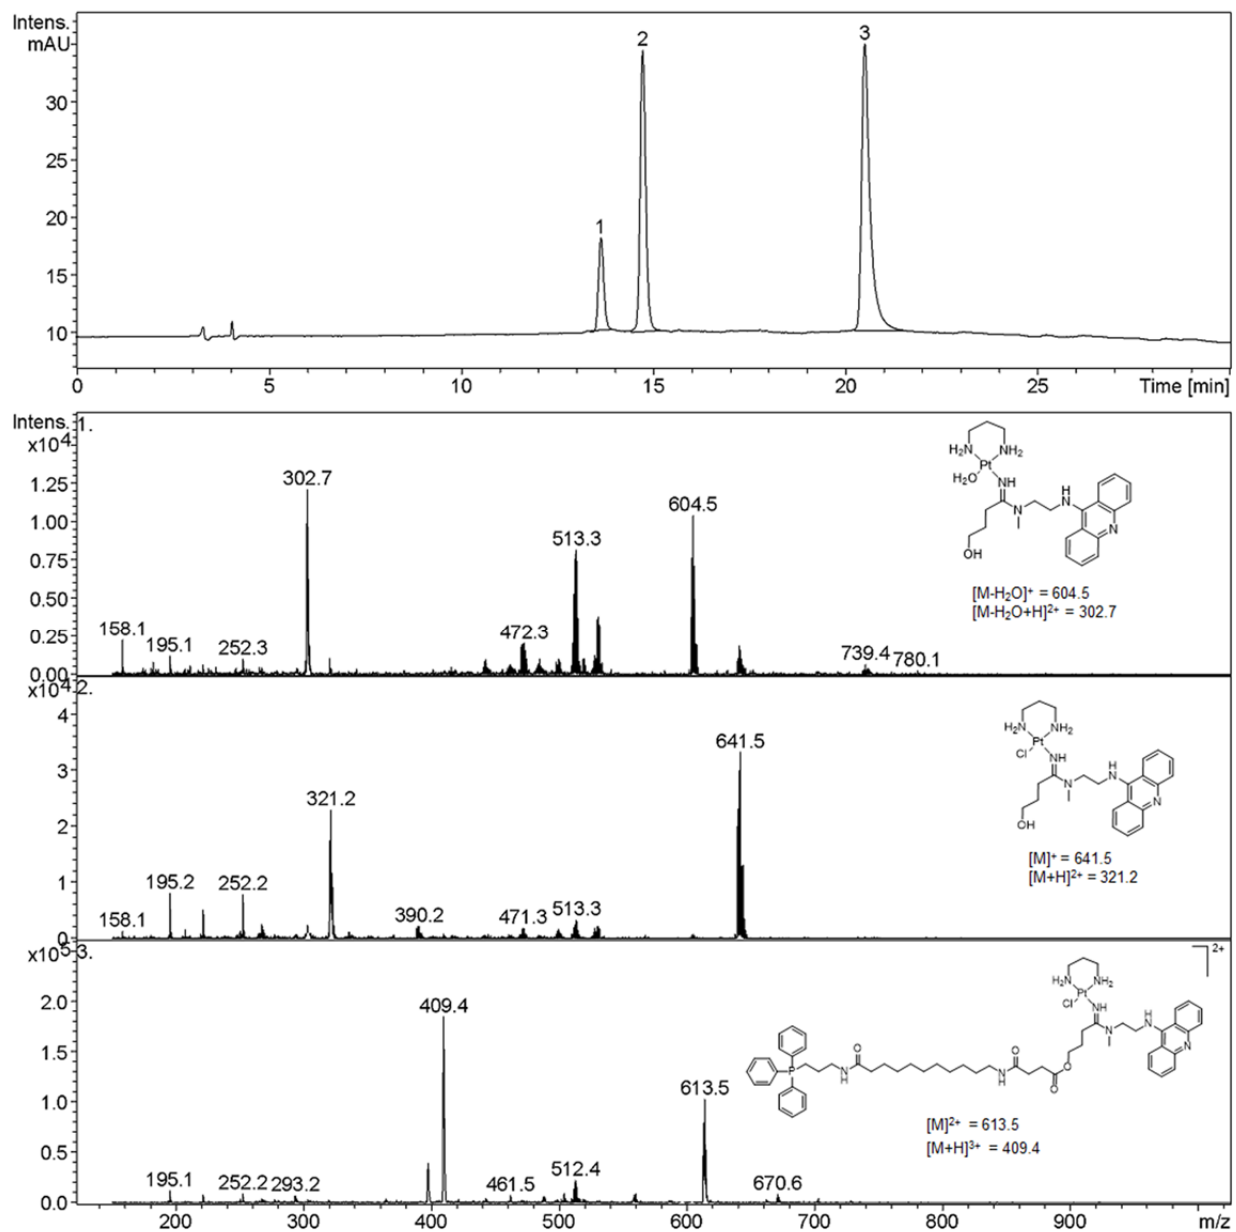

**Figure S37.** LC-ESMS analysis of the mixture of compound **P1-N9** in phosphate buffered saline (PBS, pH 7.4) incubated at 37 °C.

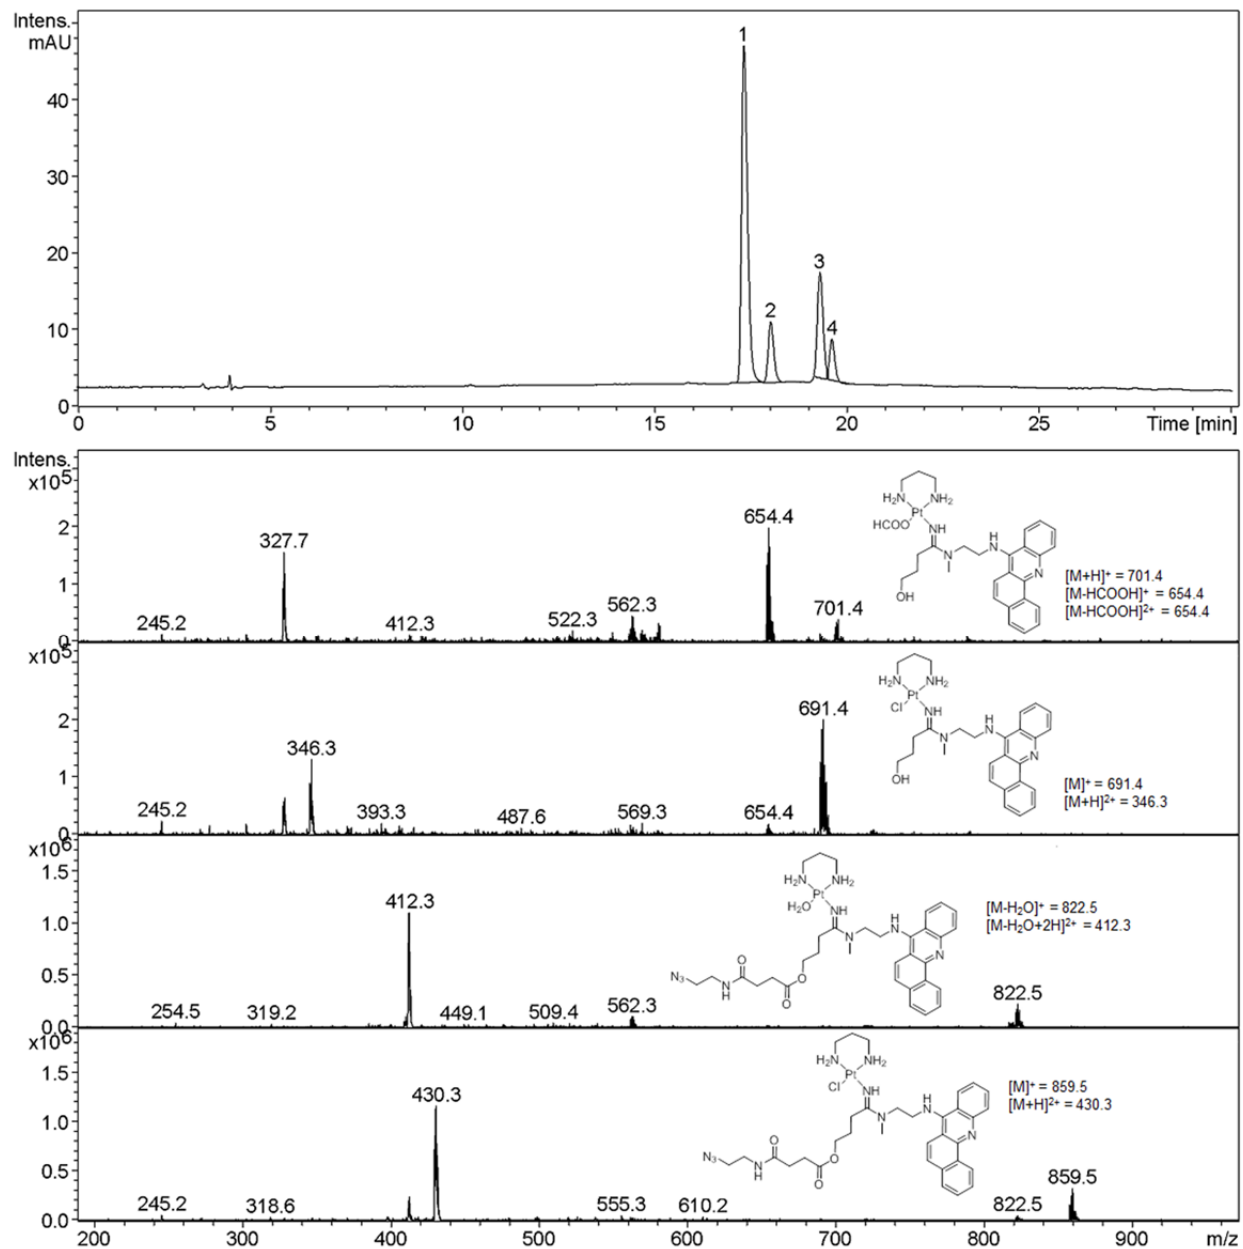

**Figure S38.** LC-ESMS analysis of the mixture of compound **P2-N1** in phosphate buffered saline (PBS, pH 7.4) incubated at 37 °C.



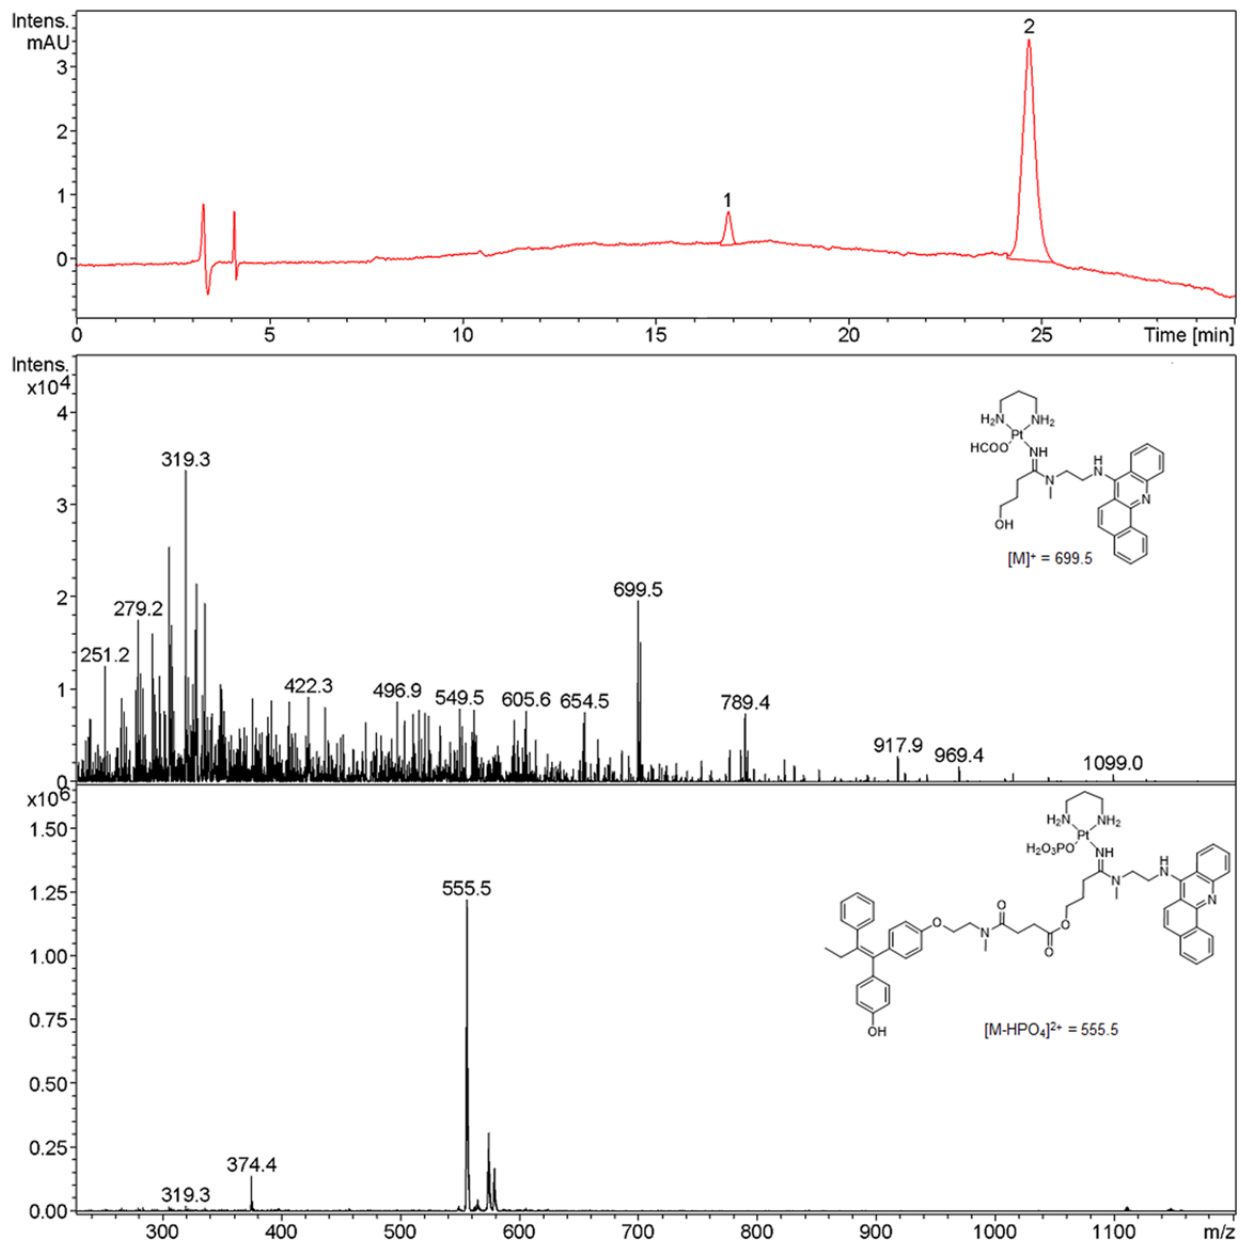

**Figure S39.** LC-ESMS analysis of the mixture of compound **P2-N6** in phosphate buffered saline (PBS, pH 7.4) incubated at 37 °C.

**Table S1.** Conversion Yields and HR-ESMS Results for Conjugates

| Compd          | Conjugate structures                                                                | Conv. (%) $\pm$ S.D. <sup>a</sup> | Calculated [M] <sup>+</sup>            | Observed [M] <sup>+</sup>              |
|----------------|-------------------------------------------------------------------------------------|-----------------------------------|----------------------------------------|----------------------------------------|
| P1-N1<br>P2-N1 | 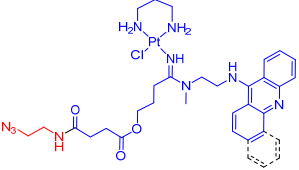   | 98.9 $\pm$ 1.4<br>98.1 $\pm$ 1.7  | 808.2778<br>858.2934                   | 808.2786<br>858.2940                   |
| P1-N2<br>P2-N2 |    | 96.6 $\pm$ 1.2<br>96.9 $\pm$ 2.3  | 963.4955<br>1013.5111                  | 963.4954<br>1013.5125                  |
| P1-N4<br>P2-N4 |    | 99.5 $\pm$ 1.9<br>99.4 $\pm$ 1.1  | 910.3458<br>960.3615                   | 910.3466<br>960.3610                   |
| P1-N5<br>P2-N5 |   | 96.4 $\pm$ 2.5<br>98.9 $\pm$ 1.4  | 1045.3619<br>1095.3776                 | 1045.3645<br>1095.3784                 |
| P1-N6<br>P2-N6 |  | 97.1 $\pm$ 2.3<br>96.7 $\pm$ 0.9  | 1095.4227<br>1145.4383                 | 1095.4242<br>1145.4391                 |
| P1-N7<br>P2-N7 |  | 97.8 $\pm$ 1.5<br>96.4 $\pm$ 2.5  | 1111.3604<br>1162.3760                 | 1111.3615<br>1162.3744                 |
| P1-N9<br>P2-N9 |  | 99.8 $\pm$ 0.2<br>99.7 $\pm$ 0.5  | 612.7688<br>637.7766 (2+) <sup>b</sup> | 612.7696<br>637.7769 (2+) <sup>b</sup> |

<sup>a</sup> Each reaction was performed in triplicate. The conversion yields were determined from HPLC traces recorded at an acridine-specific wavelength. Reactions with conversion yields lower than 90% are not reported. <sup>b</sup> Singly charged [M]<sup>+</sup> not observed in positive-ion mode. The additional fused ring in the benzofluorene derivatives (**P2**) is shown as dashed bonds.

**Table S2.** Summary of Coupling Reagents Used

| Acronym,<br>Common Name | System. Nomenclature                                                                                                | Structure |
|-------------------------|---------------------------------------------------------------------------------------------------------------------|-----------|
| EDC                     | <i>N</i> -(3-Dimethylaminopropyl)- <i>N'</i> -ethylcarbodiimide hydrochloride                                       |           |
| DCC                     | <i>N,N'</i> -Dicyclohexylcarbodiimide                                                                               |           |
| CDI                     | 1,1'-Carbonyldiimidazole                                                                                            |           |
| PyBOP                   | Benzotriazol-1-yl-oxytripyrrolidinophosphonium hexafluorophosphate                                                  |           |
| COMU                    | 1-[[1-(Cyano-2-ethoxy-2-oxoethylideneaminoxy)-dimethylamino-morpholinomethylene]] methanaminium hexafluorophosphate |           |
| TSTU                    | <i>O</i> -( <i>N</i> -Succimidinyl)- <i>N,N,N',N'</i> -tetramethyluronium tetrafluoroborate                         |           |
| HBTU                    | <i>O</i> -(Benzotriazol-1-yl)- <i>N,N,N',N'</i> -tetramethyluronium hexafluorophosphate                             |           |
